# Supplementary material for: Metformin inhibits pancreatic cancer metastasis caused by SMAD4 deficiency and consequent HNF4G upregulation
Source: PubMed Central journal article supplement (PMC7862466; doi:10.1007/s13238-020-00760-4), 2020-07-31
Supplement: 13238_2020_760_MOESM1_ESM.pdf [file 13238_2020_760_MOESM1_ESM.pdf]

## Supplementary Figure Legends

### Supplementary Figure 1. Quality control of high content screening and cell invasiveness verification.

(A and B) Pearson's correlation of the duplicated high content screening data in MIAPaCa-2 (A) and PANC-1 (B) cells. (C) Representative images of transwell assays showing significant differences in invasion and migration of PANC-1 cells with siRNA silencing of 9 genes identified from high content screening.

### Supplementary Figure 2. SMAD4 deficiency causes upregulation of HNF4G in PDAC.

(A) HNF4G mRNA levels as function of HNF4G DNA copy number or mutation. Both HNF4G mutation and amplification are null or very rare in patients reported in Queensland Centre for Medical Genomics (QCMG), International Cancer Genome Consortium (ICGC), University of Texas Southwestern Medical Center (UTSW) and the TCGA project. (B) No correlation between HNF4G gene methylation status and the HNF4G mRNA levels. (C) HNF4G mRNA levels are significantly higher in PDAC with SMAD4 truncated mutations than other mutations and wild type (WT). \*\*,  $P < 0.01$  of Wilcoxon rank-sum test. Data are derived from the TCGA PDAC dataset. (D) The DNA sequences of SBE elements in homo sapiens and mus musculus species derived from JASPAR database. (E and F) Relative expression of reporter gene bearing the HNF4G promoter region in BxPC-3 cells with or without SMAD4 overexpression (E) and in PANC-1 cells with or without SMAD4 knockdown (F). (G) The plasmid constructions showing the location of SBE mutations in HNF4G reporter (upper panel) and the locations of TSS, SBEs and TIE in HNF4G promoter region (lower panel). TSS, transcriptional start site. (H) Enrichment of HNF4G DNA with SMAD4 antibody or IgG relative to an input control in cells with or without SMAD4 knockdown. Data are mean  $\pm$  SEM from 3 independent experiments. \*,  $P < 0.05$  and \*\*,  $P < 0.01$  of Student t-test compared with IgG control or shControl.

### Supplementary Figure 3. HNF4G regulates cell-cell junction pathway to promote PDAC metastasis.

(A) Immunoblot analysis of HNF4G protein levels in PDAC cells with HNF4G knockout (left) or overexpression (right). (B) HNF4G expression knockout significantly repressed PDAC cell migration and invasion. Left panels show representative images of transwell assays and right panels show quantitative statistic. Data represent mean  $\pm$  SEM from 3 independent experiments and each had duplicate. \*\*\*\*,  $P < 0.0001$  of Student t-test. (C) The mRNA expression levels of the HNF4G downstream genes in PDAC cells with HNF4G knockout. Data are mean  $\pm$  SEM from 3 independent qRT-PCR determinations and each had triplicate. \*,  $P < 0.05$ ; \*\*,  $P < 0.01$ ; \*\*\*,  $P < 0.001$  and \*\*\*\*,  $P < 0.0001$  of Student t-test.

### Supplementary Figure 4. Metformin promotes HNF4G degradation in PDAC cells.

(A) No effect of PIK3R1 agonist isoprenaline on phosphorylation of HNF4G and AMPK $\alpha$  in T3M4 cells. (B and C) Metformin promoted HNF4G degradation

but not inhibited its synthesis in CFPAC-1 cells. Metformin treatment substantially decreased the HNF4G levels with time in cells exposed to protein synthesis inhibitor cycloheximide (CHX; 20 µg/ml) compared with cells exposed to vehicle (B); Metformin treatment no longer substantially decreased HNF4G level in cells exposed to proteasome inhibitor MG132 (5 µmol/L) (C). (D) Metformin promotes HNF4G ubiquitination. CFPAC-1 cells were treated with Metformin (10 µmol/L) for 24 h. Cell lysates were immunoprecipitated (IP) with either control IgG or antibody against HNF4G and analyzed by immunoblotting with a ubiquitin (Ub)-specific antibody. Bottom, input from cell lysates. (E and F) Effect of Metformin on HNF4G and AMPK $\alpha$  phosphorylation status in HNF4G-knockout T3M4 cells with or without ectopic expression of T143R-mutated (E) or S161A (F) mutated HNF4G. (G) Consensus phosphorylating motif structure for AMPK $\alpha$  and sequence alignments of the HNF4G S382 region in human and other species.

**Supplementary Figure 5. Suppression of HNF4G-induced PDAC metastasis by Metformin is dependent on SMAD4 status.**

(A) Metformin significantly repressed migration and invasion in BxPC-3 and T3M4 cells in a dose-dependent manner, but not in PANC-1 cells. (B) Effects of the SMAD4 status on Metformin-induced migration and invasion of PDAC cells. Left panels show transwell assay results and right panels show quantitative statistic. Data represent mean  $\pm$  SEM from 3 independent experiments and each had triplicates. \*\*\*,  $P < 0.001$  and \*\*\*\*,  $P < 0.0001$  and NS, not significant of Student t-test. See also Figure 5. (C) Mice drinking water containing Metformin (0.93 mg/ml) had similar bodyweight gain to that drinking water only during the time period of experiment.

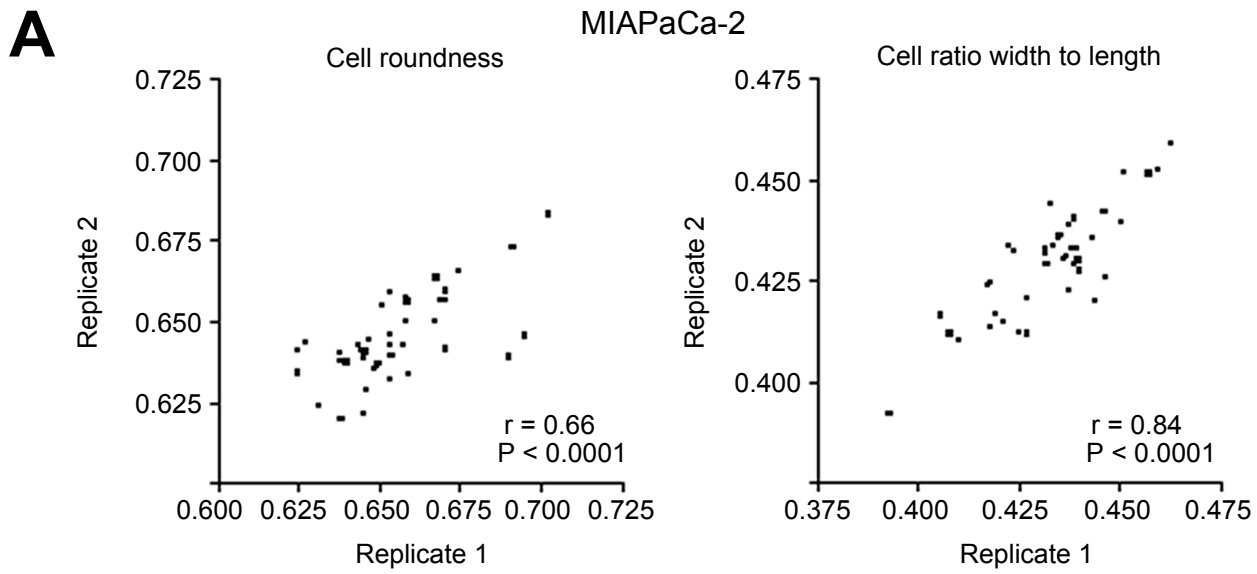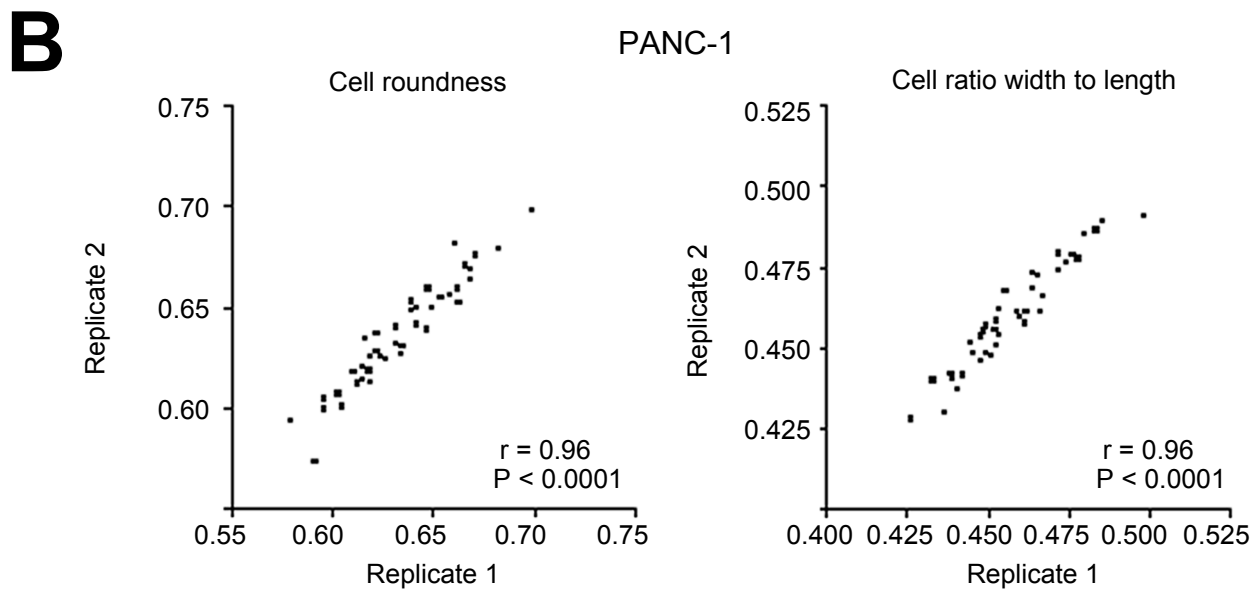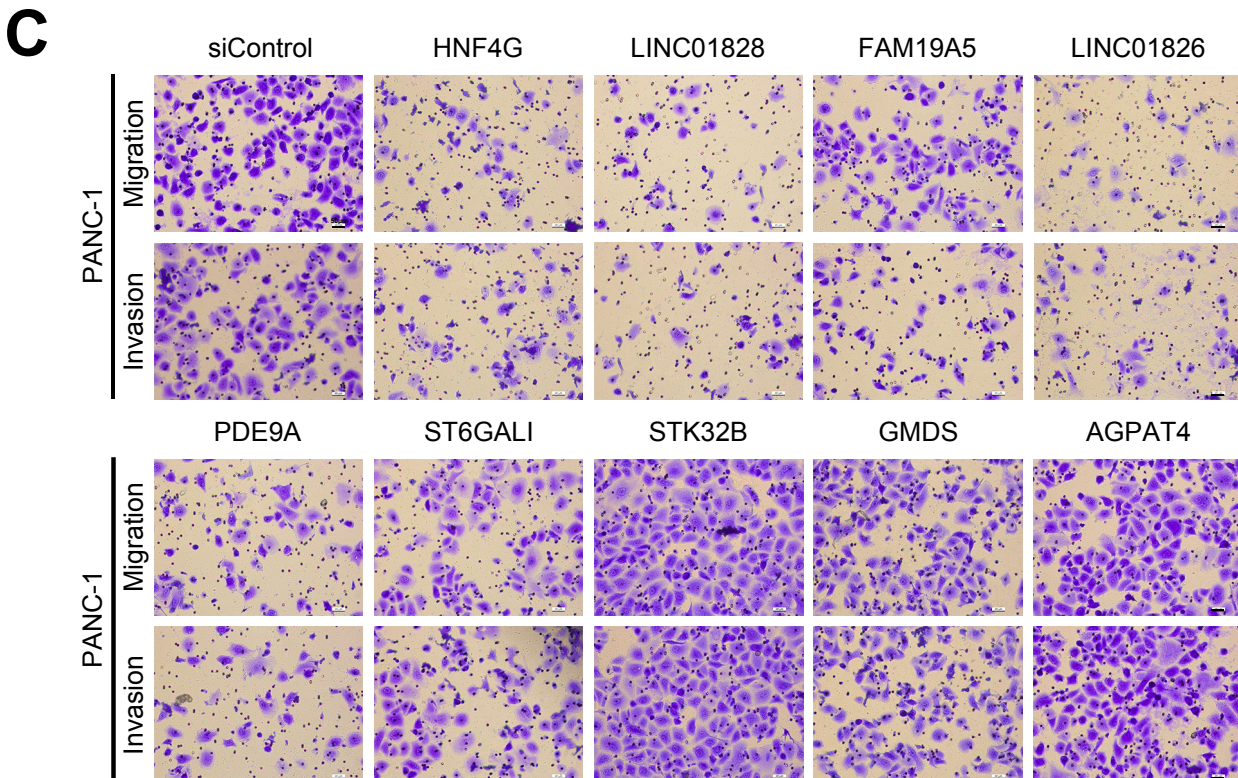

**A**

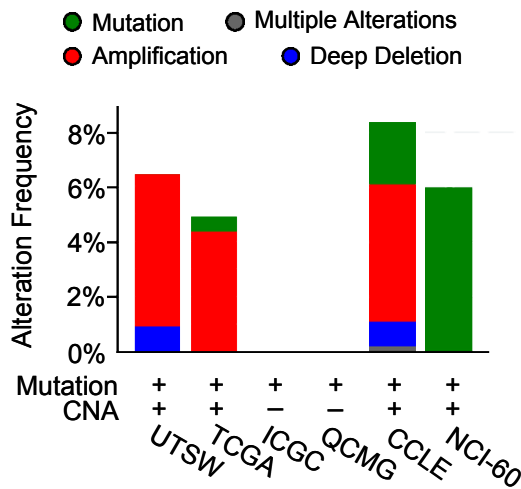

**B**

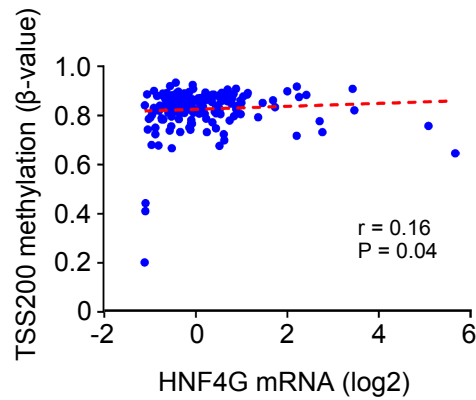

**C**

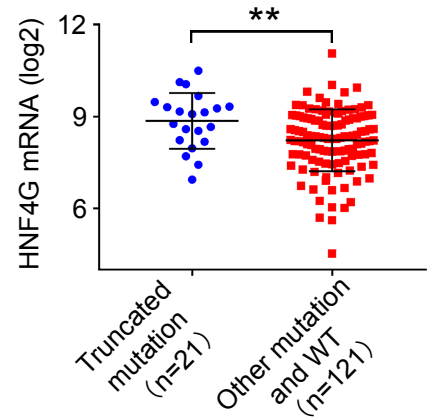

**D**

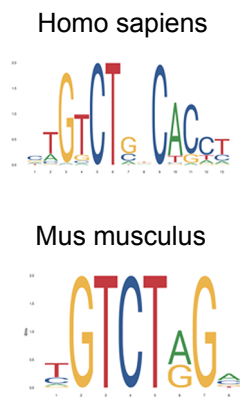

**E**

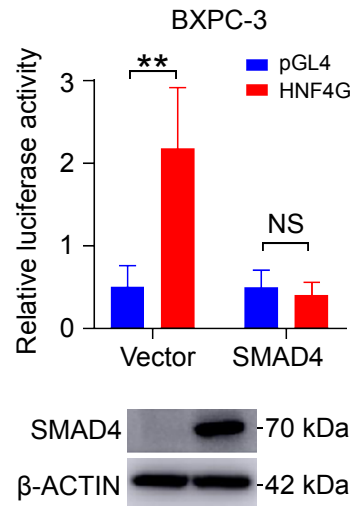

**F**

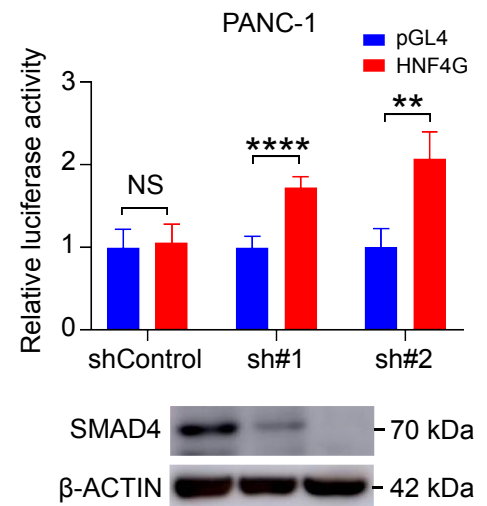

**G**

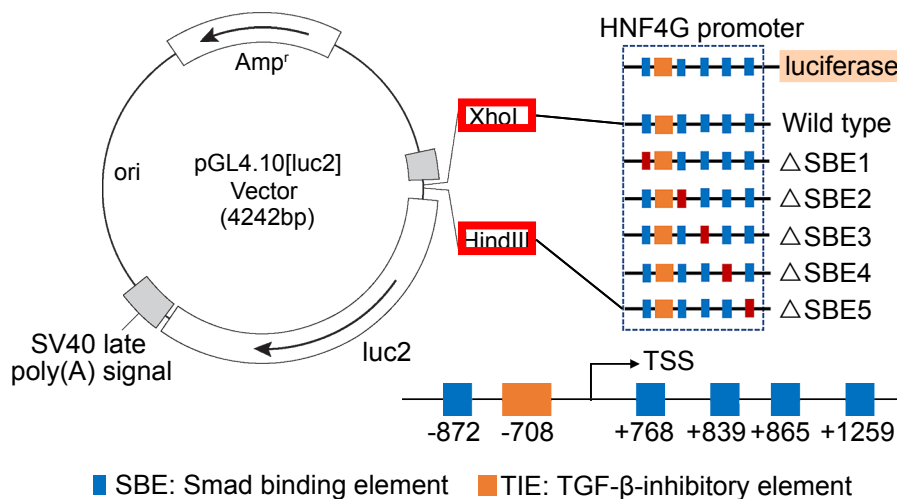

**H**

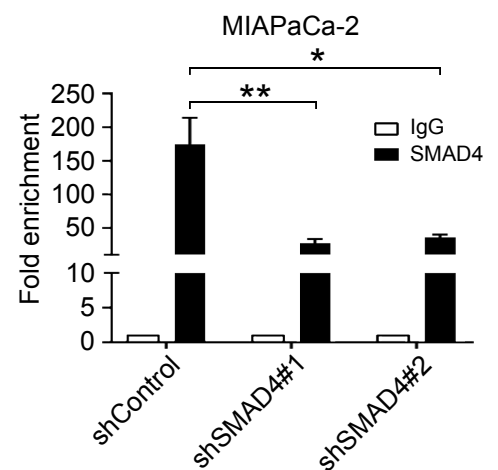

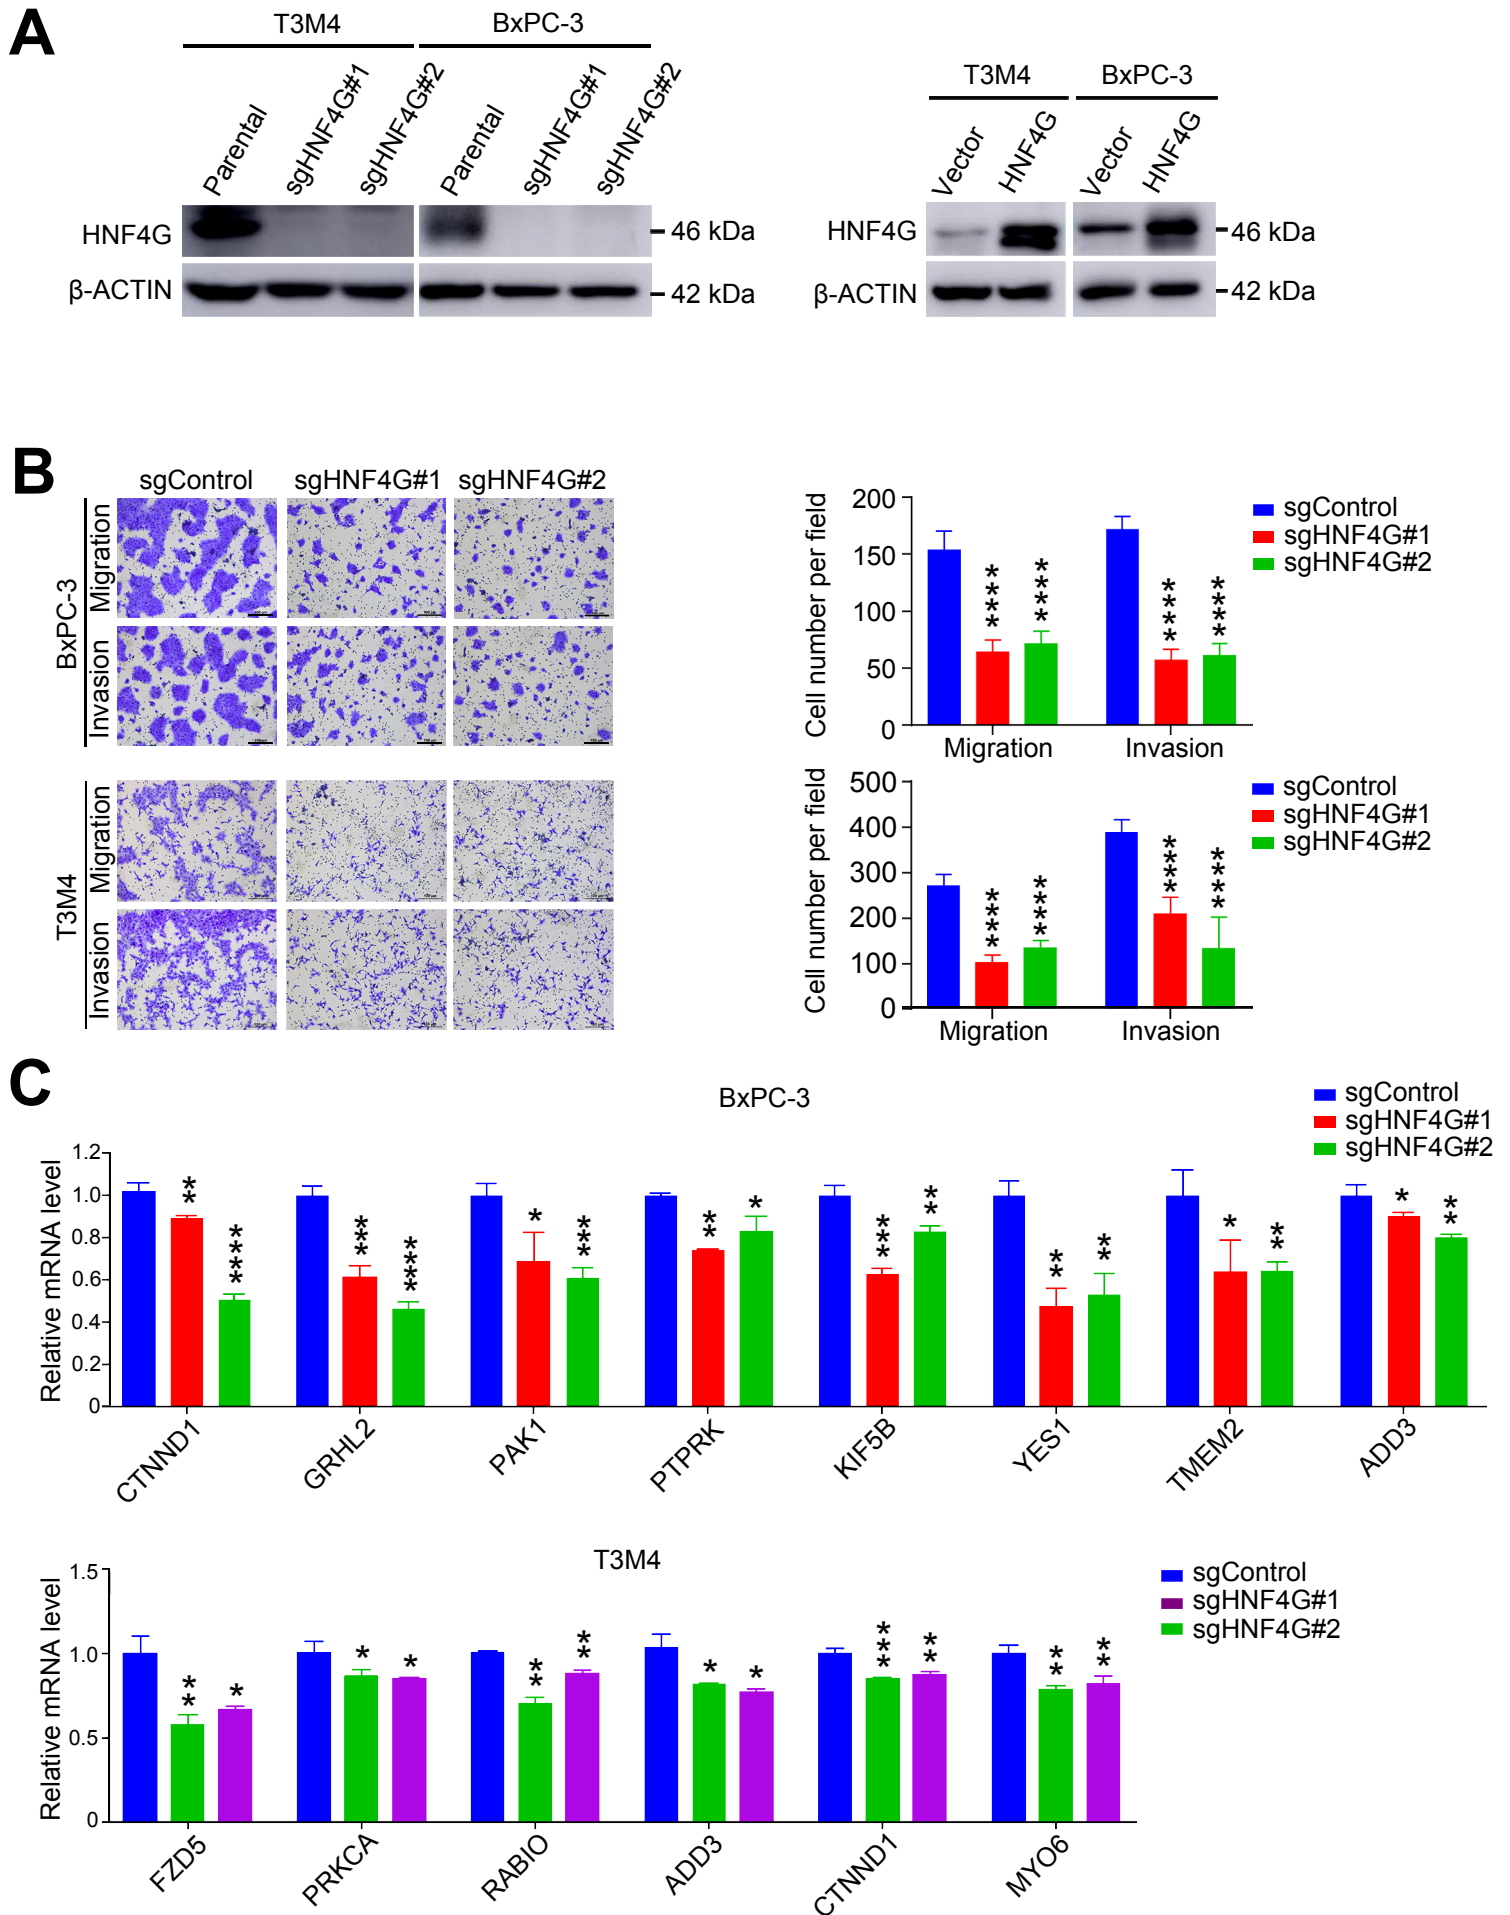

**A**

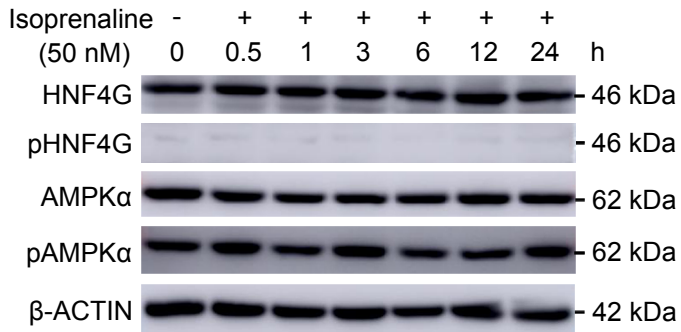

**C**

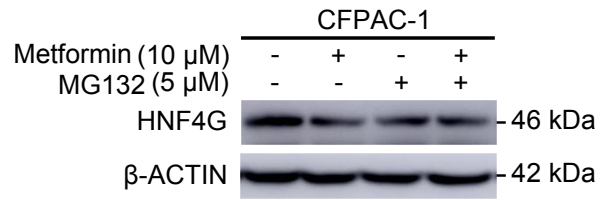

**B**

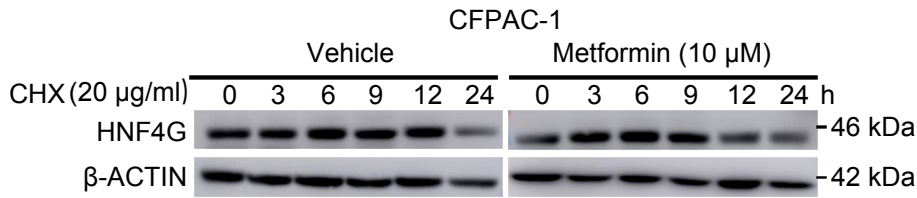

**D**

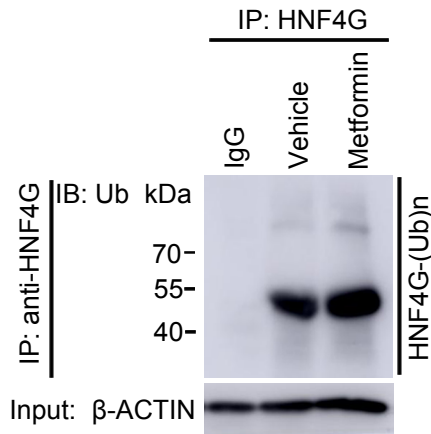

**E**

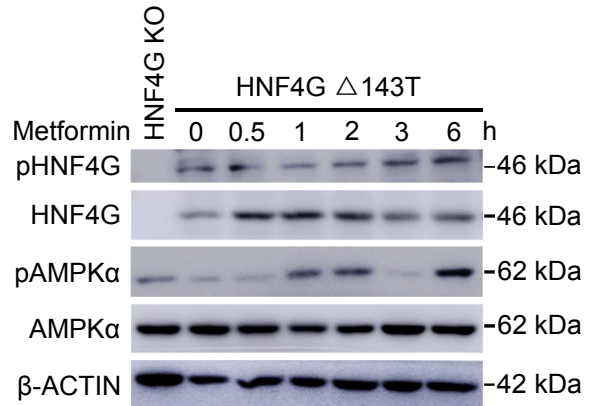

**F**

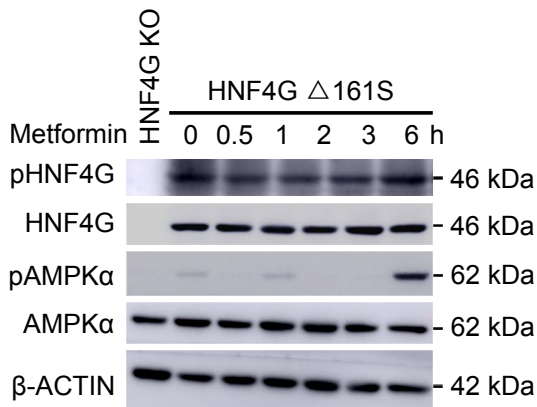

**G**

AMPK consensus motif:  $\phi X(B,X)XX(S/T)XXX\phi$

HNF4G\_HUMAN HLHHPMHPHLSQDPLTGQTILLGPMSTLVH  
 HNF4G\_MOUSE HLHHPMHPHLSQDPLTGQTILLGPMSTLVH  
 HNF4G\_CANLF HLHHPMHPHLSQDPLTGQTILLGPMSSLVH  
 HNF4G\_RAT HPHHPMHPHLSQDPLTGQTILLGPMSTLVH  
 HNF4G\_BOVIN HLHHPMHPHLSQDPLTGQTILLGSMSTLVH

**A**

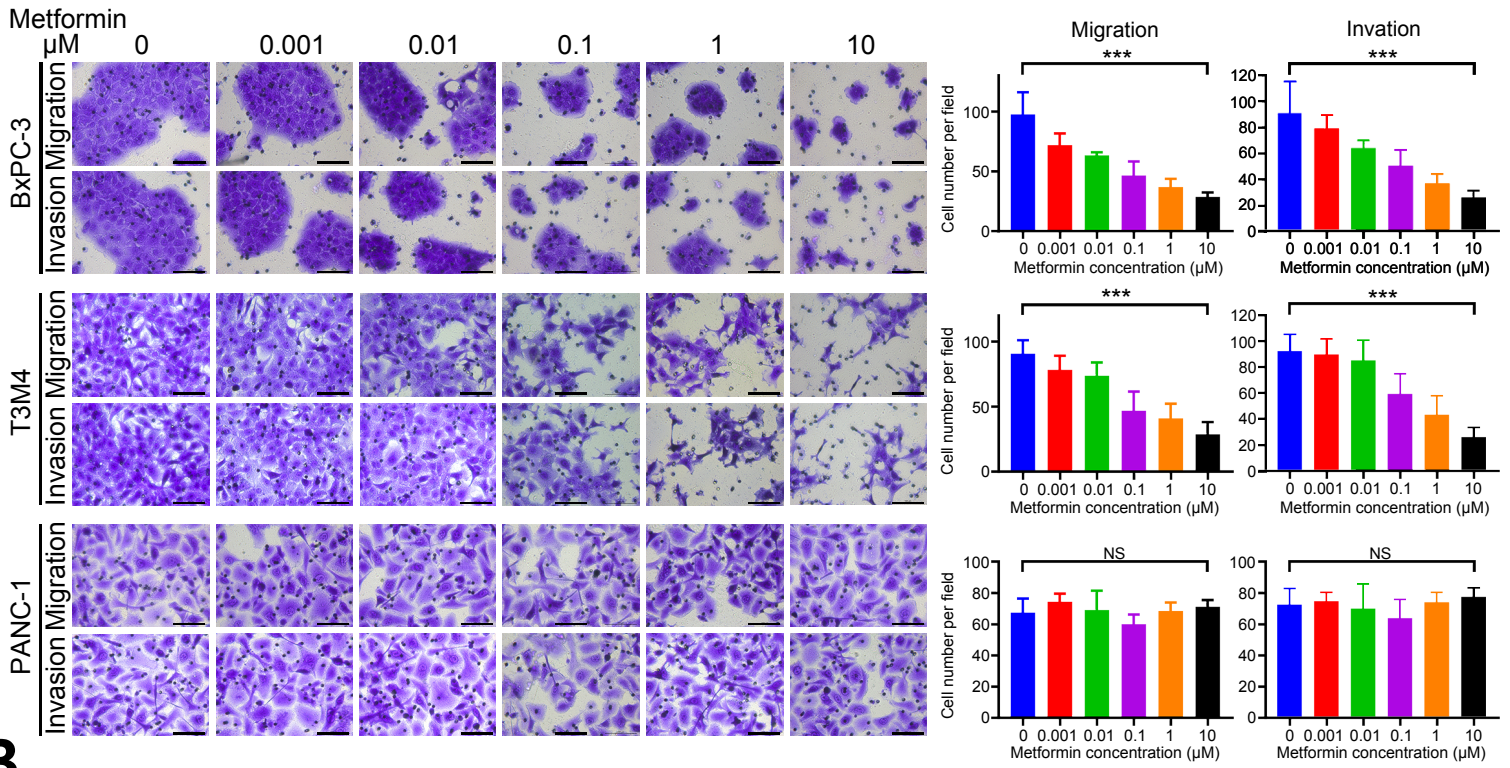

**B**

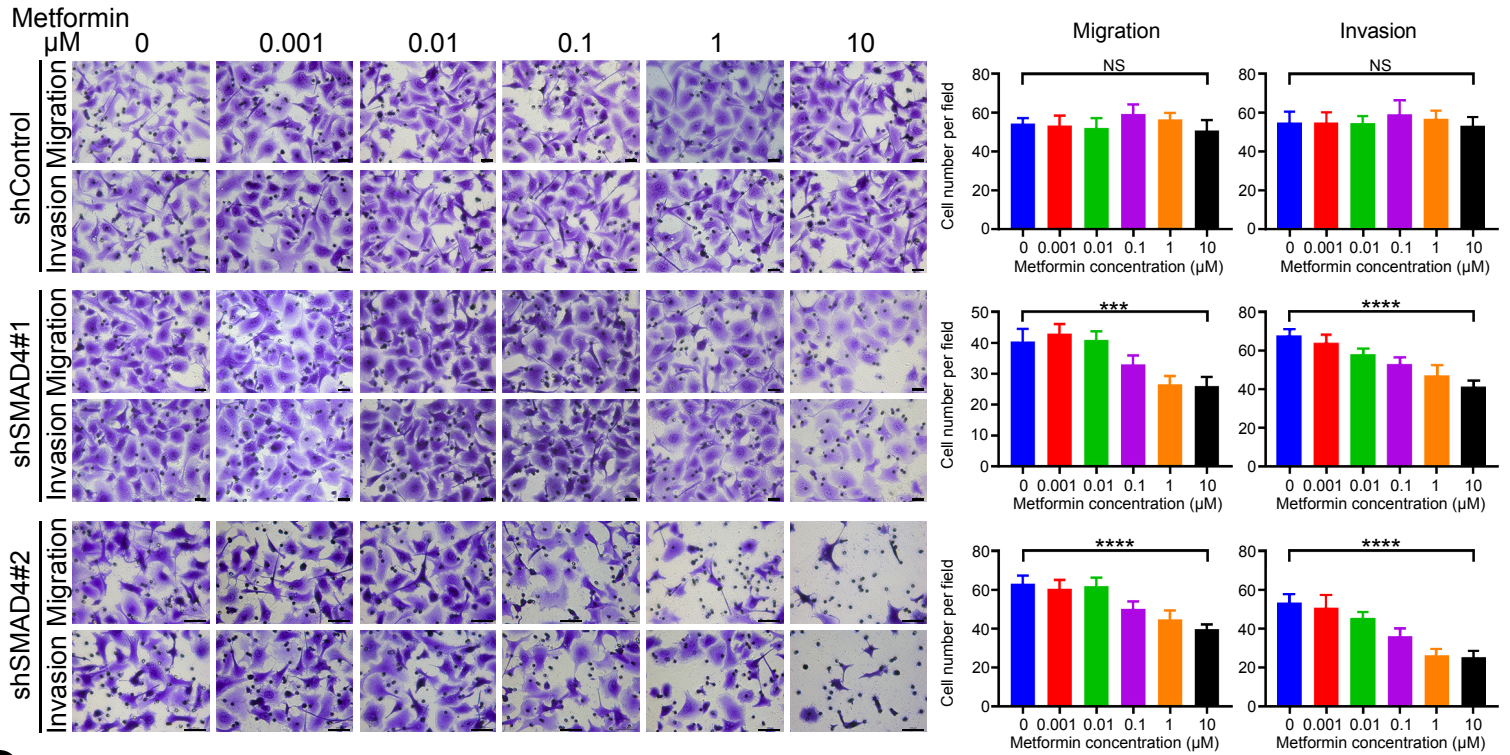

**C**

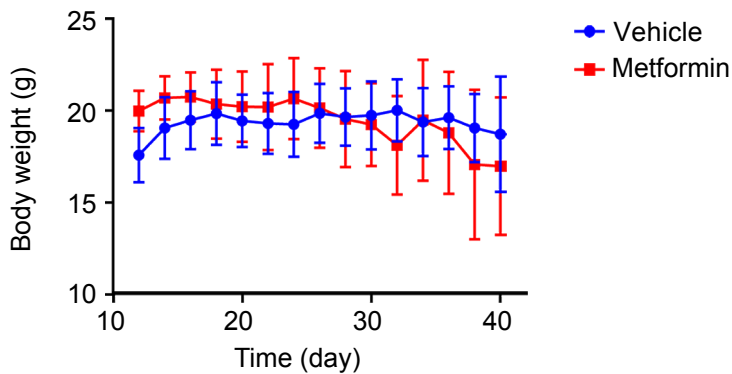

**Table S1.** GWAS-reported SNPs associated with susceptibility to pancreatic cancer

| Year             | Journal          | Marker (allele)   | Gene             | <i>P</i> value |
|------------------|------------------|-------------------|------------------|----------------|
| 2009             | <i>Nat Genet</i> | rs505922 (T, C)   | <i>ABO</i>       | 5.37E-08       |
|                  |                  | rs495828 (G, T)   | <i>ABO</i>       | 2.30E-05       |
|                  |                  | rs657152 (G, T)   | <i>ABO</i>       | 8.28E-07       |
|                  |                  | rs630014 (C, T)   | <i>ABO</i>       | 1.58E-07       |
|                  |                  | rs167020 (G, A)   | <i>SHH</i>       | 2.07E-05       |
|                  |                  | rs172310 (C, A)   | <i>SHH</i>       | 3.66E-05       |
|                  |                  | rs288746 (T, C)   | <i>SHH</i>       | 1.45E-03       |
|                  |                  | rs8028529 (T, C)  | <i>NA1</i>       | 8.53E-04       |
|                  |                  | rs4130461 (G, T)  | <i>NA1</i>       | 1.32E-02       |
|                  |                  | rs4459505 (G, A)  | <i>NA1</i>       | 3.51E-03       |
| 2010             | <i>Nat Genet</i> | rs9543325 (T, C)  | <i>NA2</i>       | 3.27E-11       |
|                  |                  | rs9564966 (G, A)  | <i>NA2</i>       | 5.86E-08       |
|                  |                  | rs3790844 (T, C)  | <i>NR5A2</i>     | 2.45E-10       |
|                  |                  | rs10919791 (G, A) | <i>NR5A2</i>     | 6.37E-10       |
|                  |                  | rs3790843 (G, A)  | <i>NR5A2</i>     | 6.69E-09       |
|                  |                  | rs12029406 (C, T) | <i>NR5A2</i>     | 1.04E-07       |
|                  |                  | rs4465241 (C, T)  | <i>NR5A2</i>     | 4.79E-07       |
|                  |                  | rs401681 (C, T)   | <i>CLPTM1L</i>   | 3.66E-07       |
| 2010             | <i>PLoS One</i>  | rs9502893 (C, T)  | <i>FOXQ1</i>     | 3.30E-07       |
|                  |                  | rs708224 (A, G)   | <i>BICD1</i>     | 3.30E-07       |
|                  |                  | rs6464375 (C, T)  | <i>DPP6</i>      | 4.41E-07       |
|                  |                  | rs6973850 (C, T)  | <i>DPP6</i>      | 6.27E-07       |
|                  |                  | rs7779540 (A, G)  | <i>DPP6</i>      | 4.58E-07       |
|                  |                  | rs11242679 (A, G) | <i>FOXQ1</i>     | 2.40E-06       |
|                  |                  | rs7750826 (A, G)  | <i>FOXQ1</i>     | 2.57E-06       |
|                  |                  | rs10487687 (A, G) | <i>DPP6</i>      | 3.35E-06       |
|                  |                  | rs11242674 (A, G) | <i>FOXQ1</i>     | 3.46E-06       |
|                  |                  | rs6711606 (G, T)  | <i>RNF149</i>    | 4.02E-06       |
|                  |                  | rs10088262 (A, G) | <i>FAM91A1</i>   | 4.30E-06       |
|                  |                  | rs7832232 (A, G)  | <i>RNF5P1</i>    | 5.10E-06       |
|                  |                  | rs6736997 (A, C)  | <i>ARL4C</i>     | 5.85E-06       |
|                  |                  | rs225190 (A, G)   | <i>MYO1D</i>     | 5.99E-06       |
|                  |                  | rs4663158 (C, T)  | <i>ARL4C</i>     | 6.91E-06       |
|                  |                  | rs2039553 (A, G)  | <i>NDFIP2</i>    | 7.01E-06       |
|                  |                  | rs1427593 (A, G)  | <i>THSD7B</i>    | 7.10E-06       |
|                  |                  | rs3016539 (A, G)  | <i>PARK2</i>     | 7.28E-06       |
|                  |                  | rs12615966 (C, T) | <i>LOC284998</i> | 7.44E-06       |
|                  |                  | rs2257205 (A, G)  | <i>RNF43</i>     | 7.74E-06       |
|                  |                  | rs6879627 (C, T)  | <i>LOC731559</i> | 8.12E-06       |
|                  |                  | rs4924935 (C, T)  | <i>PRPSAP2</i>   | 8.15E-06       |
| rs1737947 (C, T) | <i>PRPSAP2</i>   | 8.49E-06          |                  |                |
| rs1886449 (C, T) | <i>LOC730242</i> | 9.24E-06          |                  |                |



|      |                       |                   |                      |          |
|------|-----------------------|-------------------|----------------------|----------|
| 2012 | <i>Carcinogenesis</i> | rs1585440 (A, C)  | <i>LOC387933</i>     | 9.28E-06 |
|      |                       | rs4683235 (C, T)  | <i>LTF</i>           | 9.93E-06 |
|      |                       | rs7310409 (G, A)  | <i>HNF1A</i>         | 1.00E-05 |
|      |                       | rs2464196 (C, T)  | <i>HNF1A</i>         | 6.30E-05 |
|      |                       | rs1169300 (G, A)  | <i>HNF1A</i>         | 7.90E-05 |
|      |                       | rs735396 (A, G)   | <i>HNF1A</i>         | 1.00E-04 |
|      |                       | rs7953249 (A, G)  | <i>HNF1A</i>         | 2.30E-04 |
|      |                       | rs1805100 (G, A)  | <i>HNF4G</i>         | 3.20E-05 |
|      |                       | rs2977926 (T, G)  | <i>HNF4G</i>         | 3.40E-04 |
|      |                       | rs4794758 (C, T)  | <i>HNF1B</i>         | 7.30E-04 |
|      |                       | rs2043136 (T, C)  | <i>TGFBR2</i>        | 1.60E-05 |
|      |                       | rs3773650 (C, A)  | <i>TGFBR2</i>        | 7.90E-05 |
|      |                       | rs1062225 (A, G)  | <i>MAPK8</i>         | 6.30E-04 |
| 2011 | <i>Nat Genet</i>      | rs13396983 (G, A) | <i>BCL2L11</i>       | 6.80E-04 |
|      |                       | rs2015454 (C, T)  | <i>BCL2L11</i>       | 7.00E-04 |
|      |                       | rs372883 (A, G)   | <i>BACH1</i>         | 2.24E-13 |
|      |                       | rs2255280 (A, C)  | <i>DAB2</i>          | 4.18E-10 |
|      |                       | rs12413624 (A, T) | <i>PRLHR</i>         | 5.12E-11 |
|      |                       | rs1547374 (A, G)  | <i>TFF1</i>          | 3.71E-13 |
|      |                       | rs4885093 (A, G)  | <i>NA2</i>           | 1.57E-12 |
|      |                       | rs9573163 (C, G)  | <i>NA2</i>           | 5.14E-13 |
|      |                       | rs5768709 (A, G)  | <i>FAM19A5</i>       | 1.41E-10 |
|      |                       | rs2736098 (T, C)  | <i>TERT</i>          | 9.78E-14 |
| 2014 | <i>Nat Genet</i>      | rs6971499 (C, T)  | <i>LINC-PINT</i>     | 2.98E-12 |
|      |                       | rs7190458 (A, G)  | <i>BCAR1</i>         | 1.13E-10 |
|      |                       | rs9581943 (A, G)  | <i>PDX1</i>          | 2.35E-09 |
|      |                       | rs16986825 (T, C) | <i>ZNRF3</i>         | 1.18E-08 |
|      |                       | rs1561927 (C, T)  | <i>MIR1208, PVT1</i> | 1.30E-07 |
|      |                       | rs11655237 (T, C) | <i>LINC00673</i>     | 1.42E-14 |
|      |                       | rs7214041 (T, C)  | <i>LINC00673</i>     | 2.88E-14 |
| 2015 | <i>Nat Genet</i>      | rs1486134 (G, T)  | <i>ETAA1</i>         | 3.36E-09 |
|      |                       | rs17688601 (A, C) | <i>SUGCT</i>         | 1.41E-08 |
|      |                       | rs9854771 (A, G)  | <i>TP63</i>          | 2.35E-08 |
|      |                       | rs13303010 (G, A) | <i>NOC2L</i>         | 8.36E-14 |
|      |                       | rs2941471 (G, A)  | <i>HNF4G</i>         | 6.60E-10 |
| 2018 | <i>Nat Commun</i>     | rs4795218 (A, G)  | <i>HNF1B</i>         | 1.32E-08 |
|      |                       | rs1517037 (T, C)  | <i>GRP</i>           | 3.28E-08 |

---

**Table S2.** The information on 85 significant SNPs

| Chr | SNP         | Location  | Annotation          | OR   | <i>P</i> value |
|-----|-------------|-----------|---------------------|------|----------------|
| 1   | rs3790854   | 200000125 | NR5A2               | 1.28 | 3.01E-05       |
| 1   | rs3790843   | 200010824 | NR5A2               | 1.26 | 7.31E-05       |
| 2   | rs2035565   | 67619656  | ETAA1               | 1.33 | 5.39E-07       |
| 2   | rs1486133   | 67642021  | ETAA1               | 1.30 | 2.77E-06       |
| 2   | rs3770657   | 67630980  | ETAA1               | 1.30 | 3.09E-06       |
| 2   | rs6726820   | 67181166  | LINC01799           | 0.64 | 3.22E-06       |
| 2   | rs1601529   | 67594837  | (-)                 | 1.29 | 5.84E-06       |
| 2   | rs6740919   | 67620055  | ETAA1               | 1.29 | 6.60E-06       |
| 2   | rs12713595  | 67523685  | BC040863, LINC01826 | 1.28 | 8.04E-06       |
| 2   | rs7592026   | 67595139  | (-)                 | 1.28 | 8.65E-06       |
| 2   | rs13415002  | 67611823  | (-)                 | 1.27 | 1.30E-05       |
| 2   | rs12477464  | 67595239  | (-)                 | 0.78 | 1.31E-05       |
| 2   | rs1032157   | 67601816  | (-)                 | 1.28 | 1.33E-05       |
| 2   | rs961328    | 67555446  | (-)                 | 0.78 | 1.33E-05       |
| 2   | rs6710832   | 67601942  | (-)                 | 1.27 | 1.52E-05       |
| 2   | rs18122     | 67654434  | (-)                 | 1.27 | 2.17E-05       |
| 2   | rs661435    | 30189304  | (-)                 | 1.26 | 2.80E-05       |
| 2   | rs1483351   | 67520575  | BC040863, LINC01826 | 1.26 | 4.45E-05       |
| 2   | rs13016812  | 67624302  | ETAA1               | 1.25 | 6.13E-05       |
| 3   | rs1991902   | 30189304  | (-)                 | 0.78 | 2.67E-05       |
| 3   | rs56328838  | 190026785 | CLDN1               | 1.56 | 8.08E-05       |
| 5   | rs2255280   | 39394989  | DAB2                | 0.77 | 7.61E-06       |
| 5   | rs2686172   | 39395533  | DAB2                | 0.77 | 9.86E-06       |
| 5   | rs2855509   | 39396944  | DAB2                | 0.78 | 2.35E-05       |
| 5   | rs2367584   | 39412568  | DAB2                | 0.78 | 3.09E-05       |
| 6   | rs7774091   | 162353966 | PARK2, PRKN         | 1.30 | 5.78E-06       |
| 6   | rs117582557 | 161610212 | AGPAT4              | 0.34 | 5.01E-05       |
| 6   | rs139838744 | 161635358 | AGPAT4              | 0.35 | 5.96E-05       |
| 6   | rs78627167  | 1721845   | GMDS, AK024936      | 1.38 | 9.66E-05       |
| 8   | rs17299691  | 76103211  | (-)                 | 2.17 | 3.64E-12       |
| 8   | rs7822330   | 129416116 | BC009730            | 1.50 | 1.93E-06       |
| 8   | rs830772    | 76352578  | HNF4G               | 0.76 | 6.59E-06       |
| 8   | rs7012884   | 38919407  | ADAM9               | 1.64 | 2.00E-05       |
| 8   | rs7835278   | 75765947  | PI15, AK024242      | 0.39 | 4.66E-05       |
| 9   | rs2520006   | 136622110 | VAV2, AK123314      | 1.48 | 8.26E-05       |
| 10  | rs12413624  | 120278944 | (-)                 | 1.31 | 1.53E-06       |
| 10  | rs1316856   | 120267557 | (-)                 | 1.31 | 2.17E-06       |
| 10  | rs1002526   | 120304184 | (-)                 | 1.30 | 2.86E-06       |
| 10  | rs11198490  | 120339418 | (-)                 | 1.29 | 1.55E-05       |
| 10  | rs11198509  | 120370663 | (-)                 | 1.26 | 5.23E-05       |
| 13  | rs140362176 | 67072770  | PCDH9               | 0.14 | 8.71E-23       |
| 13  | rs75865077  | 67073577  | PCDH9               | 0.14 | 1.22E-22       |

|    |             |          |                    |      |          |
|----|-------------|----------|--------------------|------|----------|
| 13 | rs117015133 | 67073653 | PCDH9              | 0.14 | 1.22E-22 |
| 13 | rs75432155  | 67073075 | PCDH9              | 0.14 | 1.44E-22 |
| 13 | rs140786904 | 67072306 | PCDH9              | 0.14 | 1.94E-22 |
| 13 | rs139235823 | 67074209 | PCDH9              | 0.14 | 1.96E-22 |
| 13 | rs117841163 | 67074434 | PCDH9              | 0.14 | 4.54E-22 |
| 13 | rs117959615 | 67075365 | PCDH9              | 0.14 | 1.55E-21 |
| 13 | rs118177383 | 67076895 | PCDH9              | 0.13 | 4.26E-21 |
| 13 | rs150948452 | 67072153 | PCDH9              | 0.18 | 5.04E-21 |
| 13 | rs75523662  | 67077040 | PCDH9              | 0.12 | 5.26E-21 |
| 13 | rs78167153  | 67077578 | PCDH9              | 0.12 | 2.68E-20 |
| 13 | rs139429747 | 67071311 | PCDH9              | 0.46 | 8.45E-11 |
| 13 | rs147547981 | 67071300 | PCDH9              | 0.59 | 6.76E-07 |
| 13 | rs4885093   | 73910026 | (-)                | 1.31 | 1.68E-06 |
| 13 | rs9573163   | 73908846 | (-)                | 1.30 | 3.18E-06 |
| 13 | rs287553    | 73904230 | (-)                | 1.30 | 3.71E-06 |
| 13 | rs9318163   | 73897389 | (-)                | 1.29 | 7.11E-06 |
| 13 | rs2265326   | 66061553 | (-)                | 0.73 | 3.22E-05 |
| 13 | rs17090071  | 73929428 | (-)                | 1.27 | 7.97E-05 |
| 15 | rs4924065   | 36703076 | (-)                | 6.34 | 8.21E-38 |
| 15 | rs1846137   | 36155088 | DPH6-AS1           | 0.74 | 2.97E-05 |
| 16 | rs17205188  | 54685198 | (-)                | 0.69 | 7.03E-05 |
| 17 | rs1304660   | 70226409 | (-)                | 5.95 | 3.34E-27 |
| 17 | rs4793412   | 70226159 | (-)                | 0.39 | 5.65E-06 |
| 17 | rs9893376   | 18823578 | PRPSAP2            | 0.58 | 9.35E-06 |
| 17 | rs7225065   | 57373202 | (-)                | 0.25 | 3.69E-05 |
| 17 | rs11655237  | 70400166 | Mir_584, LIN00673  | 1.30 | 4.71E-05 |
| 20 | rs6104137   | 44014286 | SYS1, TP53TG5      | 0.63 | 8.64E-14 |
| 21 | rs372883    | 30717737 | BACH1              | 0.73 | 8.80E-08 |
| 21 | rs1153294   | 30701096 | BACH1              | 0.74 | 1.17E-07 |
| 21 | rs2027605   | 30726773 | BACH1              | 0.74 | 1.37E-07 |
| 21 | rs2832290   | 30728863 | BACH1              | 0.74 | 1.52E-07 |
| 21 | rs1153287   | 30685611 | BACH1              | 0.74 | 1.82E-07 |
| 21 | rs117214    | 30720834 | BACH1              | 0.74 | 1.98E-07 |
| 21 | rs1153280   | 30678072 | BACH1              | 0.74 | 3.28E-07 |
| 21 | rs1547374   | 43778895 | TFF2, TFF1         | 0.75 | 1.43E-06 |
| 21 | rs1236481   | 30697673 | BACH1              | 0.75 | 1.77E-06 |
| 21 | rs363445    | 30986229 | GRIK1, GRIK1-AS2   | 0.76 | 1.01E-05 |
| 21 | rs16982189  | 29728865 | (-)                | 1.37 | 1.68E-05 |
| 21 | rs2839486   | 43768197 | TFF2               | 0.76 | 2.58E-05 |
| 21 | rs4920087   | 43776839 | TFF2, TFF1         | 0.76 | 3.44E-05 |
| 21 | rs12626719  | 30902661 | GRIK1              | 0.70 | 4.82E-05 |
| 21 | rs2269130   | 44078191 | PDE9A, BC033260    | 0.78 | 6.39E-05 |
| 22 | rs5768709   | 48929569 | FAM19A5, LOC284933 | 1.34 | 3.93E-06 |

Chr, chromosome; OR, odds ratio; (-), gene desert region

**Table S3.** High content screening results

| Gene               | Cell Roundness |        | Cell Ratio |        |
|--------------------|----------------|--------|------------|--------|
|                    | MIAPaCa-2      | Panc-1 | MIAPaCa-2  | Panc-1 |
| <i>HNFB4G</i>      | 1.17           | 1.13   | 1.27       | 1.13   |
| <i>LINC01826</i>   | 1.10           | 1.14   | 1.13       | 1.12   |
| <i>STK32B</i>      | 1.14           | 1.07   | 1.22       | 1.11   |
| <i>GMDS</i>        | 1.08           | 1.13   | 1.09       | 1.10   |
| <i>FAM19A5</i>     | 1.06           | 1.14   | 1.09       | 1.13   |
| <i>PDE9A</i>       | 1.08           | 1.11   | 1.11       | 1.10   |
| <i>ST6GALI</i>     | 1.09           | 1.10   | 1.11       | 1.12   |
| <i>LINC01828</i>   | 1.09           | 1.07   | 1.12       | 1.12   |
| <i>AGPAT4</i>      | 1.08           | 1.09   | 1.15       | 1.06   |
| <i>CLDN1</i>       | 1.04           | 1.11   | 1.03       | 1.09   |
| <i>DAB2</i>        | 1.05           | 1.09   | 1.04       | 1.08   |
| <i>SYS1-DBNPD2</i> | 1.03           | 1.09   | 1.05       | 1.11   |
| <i>PLI5</i>        | 1.03           | 1.09   | 1.06       | 1.07   |
| <i>GRIK1</i>       | 1.08           | 1.04   | 1.11       | 1.08   |
| <i>ADAM9</i>       | 1.06           | 1.06   | 1.09       | 1.06   |
| <i>SYS1</i>        | 1.04           | 1.08   | 1.03       | 1.11   |
| <i>VAV2</i>        | 1.01           | 1.10   | 1.01       | 1.09   |
| <i>GRIK1-AS2</i>   | 1.04           | 1.06   | 1.07       | 1.06   |
| <i>GLIS3</i>       | 1.04           | 1.05   | 1.04       | 1.03   |
| <i>HSD17B12</i>    | 1.03           | 1.06   | 1.03       | 1.03   |
| <i>LINC00824</i>   | 1.03           | 1.04   | 1.01       | 1.04   |
| <i>LRPPRC</i>      | 1.04           | 1.03   | 1.06       | 1.06   |
| <i>TPM1</i>        | 1.02           | 1.04   | 1.06       | 1.04   |
| <i>DPH6-AS1</i>    | 1.04           | 1.02   | 1.02       | 1.05   |
| <i>ZNF385D</i>     | 1.03           | 1.03   | 1.07       | 1.04   |
| <i>PCDH9</i>       | 1.02           | 1.03   | 1.06       | 0.99   |
| <i>TFF1</i>        | 1.01           | 1.04   | 1.01       | 1.03   |
| <i>LINC017992</i>  | 1.03           | 1.02   | 1.04       | 1.04   |
| <i>RCL1</i>        | 1.00           | 1.05   | 1.00       | 1.02   |
| <i>NR5A2</i>       | 1.04           | 1.00   | 1.07       | 1.01   |
| <i>KRAS</i>        | 1.00           | 1.04   | 1.06       | 1.01   |
| <i>TFF2</i>        | 1.01           | 1.01   | 1.00       | 1.02   |
| <i>PRPK2</i>       | 1.00           | 1.01   | 1.06       | 1.03   |
| <i>TP53-TG5</i>    | 1.02           | 0.98   | 1.03       | 0.99   |
| <i>ETAA1</i>       | 1.00           | 0.99   | 1.02       | 0.99   |
| <i>PRPSAP</i>      | 0.98           | 1.01   | 0.97       | 1.02   |
| <i>L3MBTL1</i>     | 0.96           | 1.02   | 0.94       | 1.04   |

**Table S4.** QIAGEN-predicted 115 transcriptional factors that might bind to HFN4G promoter or enhancer

|                 |                |                |                |
|-----------------|----------------|----------------|----------------|
| <i>ZIC2</i>     | <i>CREM</i>    | <i>ZNF207</i>  | <i>TFE3</i>    |
| <i>BCL6</i>     | <i>THAP11</i>  | <i>SP3</i>     | <i>L3MBTL2</i> |
| <i>SOX13</i>    | <i>KLF11</i>   | <i>ZHX2</i>    | <i>RNF2</i>    |
| <i>MLX</i>      | <i>GATAD2B</i> | <i>MXD4</i>    | <i>NFIA</i>    |
| <i>ZEB2</i>     | <i>TGIF2</i>   | <i>PPARG</i>   | <i>KLF6</i>    |
| <i>NR3C1</i>    | <i>RAD51</i>   | <i>SSRP1</i>   | <i>ZNF511</i>  |
| <i>HNF4A</i>    | <i>KLF16</i>   | <i>ZNF610</i>  | <i>NRF1</i>    |
| <i>CTCF</i>     | <i>CEBPA</i>   | <i>GLIS1</i>   | <i>NR2F1</i>   |
| <i>DRAP1</i>    | <i>IRF1</i>    | <i>MXD3</i>    | <i>ZFP37</i>   |
| <i>ZNF792</i>   | <i>ZBTB26</i>  | <i>RCOR2</i>   | <i>ZGPAT</i>   |
| <i>RING1</i>    | <i>PRDM1</i>   | <i>KDM1A</i>   | <i>HDAC2</i>   |
| <i>ZNF580</i>   | <i>MGA</i>     | <i>ZZZ3</i>    | <i>TCF7</i>    |
| <i>REST</i>     | <i>TFAP4</i>   | <i>SUZ12</i>   | <i>KLF9</i>    |
| <i>RBBP5</i>    | <i>MXI1</i>    | <i>HBP1</i>    | <i>ZFX</i>     |
| <i>MIER3</i>    | <i>SAP130</i>  | <i>EED</i>     | <i>ZNF423</i>  |
| <i>GLIS2</i>    | <i>TAF1</i>    | <i>ZBTB20</i>  | <i>GABPB1</i>  |
| <i>DMAP1</i>    | <i>MAX</i>     | <i>SOX5</i>    | <i>MBD1</i>    |
| <i>EP300</i>    | <i>EBF1</i>    | <i>BHLHE40</i> | <i>FOXP2</i>   |
| <i>HIC1</i>     | <i>E2F1</i>    | <i>FOXA3</i>   | <i>SMAD4</i>   |
| <i>MLLT1</i>    | <i>GATAD1</i>  | <i>MNT</i>     | <i>TRIM28</i>  |
| <i>HNRNPUL1</i> | <i>NCOR1</i>   | <i>HMG20A</i>  | <i>ELF3</i>    |
| <i>FOXA2</i>    | <i>POLR2A</i>  | <i>ZNF394</i>  | <i>TBP</i>     |
| <i>ARID4B</i>   | <i>PATZ1</i>   | <i>ZBTB8A</i>  | <i>TBL1XR1</i> |
| <i>ZNF2</i>     | <i>EZH2</i>    | <i>ZNF501</i>  | <i>DNMT3B</i>  |
| <i>ZNF48</i>    | <i>GATAD2A</i> | <i>DPF2</i>    | <i>RAD21</i>   |
| <i>YY1</i>      | <i>PHF8</i>    | <i>HNF1A</i>   | <i>RARA</i>    |
| <i>SLC30A9</i>  | <i>ZNF687</i>  | <i>ZNF692</i>  | <i>KAT2B</i>   |
| <i>IKZF2</i>    | <i>ZNF366</i>  |                |                |

**Table S5.** 293 downstream target genes of HNF4G

| Gene                | Chr.  | Start     | End       | Annotation                            |
|---------------------|-------|-----------|-----------|---------------------------------------|
| <i>CORO2A</i>       | chr9  | 100945154 | 100945871 | intron (NM_052820, intron 1 of 11)    |
| <i>CREB3L3</i>      | chr19 | 4153154   | 4153779   | promoter-TSS (NM_032607)              |
| <i>SLC22A23</i>     | chr6  | 3378241   | 3378702   | intron (NM_001286456, intron 3 of 3)  |
| <i>OCLN</i>         | chr5  | 68813641  | 68814019  | intron (NM_001205255, intron 2 of 6)  |
| <i>RNF128</i>       | chrX  | 105962034 | 105962324 | intron (NM_024539, intron 1 of 6)     |
| <i>C1orf115</i>     | chr1  | 220871902 | 220872361 | 3' UTR (NM_024709, exon 2 of 2)       |
| <i>PCK2</i>         | chr14 | 24562951  | 24563802  | promoter-TSS (NM_004563)              |
| <i>GOLGA4</i>       | chr3  | 37284924  | 37285422  | intron (NM_001172713, intron 1 of 22) |
| <i>GRHL2</i>        | chr8  | 102585508 | 102585867 | intron (NM_024915, intron 5 of 15)    |
| <i>CHN2</i>         | chr7  | 29376553  | 29377213  | intron (NM_004067, intron 1 of 12)    |
| <i>C1orf106</i>     | chr1  | 200865604 | 200866368 | intron (NM_001142569, intron 1 of 9)  |
| <i>SPTBN1</i>       | chr2  | 54799411  | 54799820  | intron (NM_178313, intron 1 of 30)    |
| <i>SUCLG2</i>       | chr3  | 67551210  | 67551432  | intron (NM_003848, intron 7 of 10)    |
| <i>LOC201651</i>    | chr3  | 151487907 | 151488434 | promoter-TSS (NR_026915)              |
| <i>NQO1</i>         | chr16 | 69760078  | 69761071  | promoter-TSS (NM_001025433)           |
| <i>LOC100129034</i> | chr9  | 127113238 | 127113616 | 3' UTR (NM_001166167, exon 10 of 10)  |
| <i>C9orf41</i>      | chr9  | 77616741  | 77617424  | intron (NM_152420, intron 3 of 7)     |
| <i>ROCK2</i>        | chr2  | 11485385  | 11485862  | promoter-TSS (NM_004850)              |
| <i>CCDC68</i>       | chr18 | 52626408  | 52626943  | promoter-TSS (NM_025214)              |
| <i>EFNA2</i>        | chr19 | 1291637   | 1292154   | intron (NM_001405, intron 1 of 3)     |
| <i>ATE1</i>         | chr10 | 123602926 | 123603316 | intron (NM_001001976, intron 8 of 11) |
| <i>NCOA2</i>        | chr8  | 71244768  | 71245258  | intron (NM_006540, intron 1 of 22)    |
| <i>FRMD3</i>        | chr9  | 86087063  | 86087577  | intron (NM_001244959, intron 1 of 14) |
| <i>CDKN2AIP</i>     | chr4  | 184365001 | 184366012 | promoter-TSS (NM_017632)              |
| <i>GSR</i>          | chr8  | 30580288  | 30580587  | intron (NM_001195103, intron 1 of 11) |
| <i>TJP2</i>         | chr9  | 71793355  | 71793742  | intron (NM_001170630, intron 1 of 18) |
| <i>CDH1</i>         | chr16 | 68824048  | 68824509  | intron (NM_004360, intron 2 of 15)    |
| <i>CALML4</i>       | chr15 | 68484430  | 68484668  | non-coding (NR_104583, exon 2 of 2)   |
| <i>ARHGAP12</i>     | chr10 | 32218177  | 32218567  | promoter-TSS (NM_018287)              |
| <i>PCGF5</i>        | chr10 | 92979528  | 92980204  | promoter-TSS (NM_032373)              |
| <i>TMEM45B</i>      | chr11 | 129687475 | 129687954 | intron (NM_138788, intron 1 of 5)     |
| <i>GALNT7</i>       | chr4  | 173647211 | 173647636 | intron (NM_001034845, intron 5 of 12) |
| <i>FNIP2</i>        | chr4  | 159733728 | 159734100 | intron (NM_020840, intron 1 of 16)    |
| <i>MAGI3</i>        | chr1  | 113936805 | 113937256 | intron (NM_152900, intron 1 of 20)    |
| <i>ALDOB</i>        | chr9  | 104195370 | 104195985 | intron (NM_000035, intron 1 of 8)     |
| <i>TMEM2</i>        | chr9  | 74373732  | 74374098  | intron (NM_013390, intron 1 of 23)    |
| <i>ELOVL7</i>       | chr5  | 60097462  | 60097836  | intron (NM_024930, intron 1 of 8)     |
| <i>NHSL1</i>        | chr6  | 138825083 | 138825870 | intron (NM_020464, intron 1 of 6)     |
| <i>PTPRK</i>        | chr6  | 128602140 | 128602504 | intron (NM_001135648, intron 3 of 30) |
| <i>NHEJ1</i>        | chr2  | 219976216 | 219976737 | intron (NM_024782, intron 5 of 7)     |
| <i>APOL6</i>        | chr22 | 36044305  | 36044792  | 5' UTR (NM_030641, exon 1 of 3)       |
| <i>ASAH2</i>        | chr10 | 52153499  | 52153907  | intron (NM_147156, intron 6 of 10)    |

|                 |       |           |           |                                       |
|-----------------|-------|-----------|-----------|---------------------------------------|
| <i>SH3RF2</i>   | chr5  | 145361478 | 145361806 | intron (NM_152550, intron 2 of 9)     |
| <i>PPFIBP2</i>  | chr11 | 7546634   | 7547050   | intron (NM_003621, intron 1 of 23)    |
| <i>TCF7L2</i>   | chr10 | 114729258 | 114729668 | intron (NM_001146274, intron 4 of 13) |
| <i>RBM47</i>    | chr4  | 40543295  | 40543581  | intron (NM_001098634, intron 2 of 6)  |
| <i>APOB</i>     | chr2  | 21265630  | 21266406  | intron (NM_000384, intron 2 of 28)    |
| <i>MYO6</i>     | chr6  | 76601385  | 76601621  | intron (NM_004999, intron 27 of 34)   |
| <i>EFTUD1</i>   | chr15 | 82524222  | 82524569  | intron (NM_001040610, intron 5 of 17) |
| <i>GNA11</i>    | chr19 | 3093850   | 3094189   | promoter-TSS (NM_002067)              |
| <i>FMO5</i>     | chr1  | 146683141 | 146683475 | intron (NM_001461, intron 5 of 8)     |
| <i>RFFL</i>     | chr17 | 33402337  | 33402703  | intron (NR_037713, intron 1 of 6)     |
| <i>SLC37A1</i>  | chr21 | 43946409  | 43946937  | intron (NM_018964, intron 4 of 20)    |
| <i>TREH</i>     | chr11 | 118550202 | 118550565 | promoter-TSS (NM_007180)              |
| <i>ACSL5</i>    | chr10 | 114154070 | 114154677 | intron (NM_016234, intron 1 of 20)    |
| <i>CYP3A4</i>   | chr7  | 99370164  | 99370565  | intron (NM_001202855, intron 3 of 12) |
| <i>CAMK2D</i>   | chr4  | 114557506 | 114557920 | intron (NM_172115, intron 3 of 16)    |
| <i>FZD5</i>     | chr2  | 208712454 | 208713054 | intron (NM_001080475, intron 7 of 7)  |
| <i>HNF4A</i>    | chr20 | 42999153  | 42999656  | intron (NM_001030003, intron 1 of 9)  |
| <i>C4orf19</i>  | chr4  | 37432957  | 37433328  | intron (NM_001144990, intron 4 of 6)  |
| <i>HSD17B2</i>  | chr16 | 82093455  | 82094205  | intron (NM_002153, intron 1 of 4)     |
| <i>ANXA13</i>   | chr8  | 124733017 | 124733281 | intron (NM_004306, intron 1 of 10)    |
| <i>GLCE</i>     | chr15 | 69514223  | 69514594  | intron (NM_015554, intron 2 of 4)     |
| <i>ABCG2</i>    | chr4  | 89028468  | 89029335  | intron (NM_001257386, intron 9 of 15) |
| <i>ZDHHC20</i>  | chr13 | 22027866  | 22028182  | intron (NR_104487, intron 1 of 12)    |
| <i>TRIM10</i>   | chr6  | 30122468  | 30122884  | intron (NM_006778, intron 6 of 6).4   |
| <i>ATP7B</i>    | chr13 | 52553090  | 52553470  | intron (NM_001005918, intron 1 of 16) |
| <i>ARHGEF12</i> | chr11 | 120206581 | 120207040 | promoter-TSS (NM_001198665)           |
| <i>EPS8L3</i>   | chr1  | 110306393 | 110306974 | promoter-TSS (NM_024526)              |
| <i>FAM83G</i>   | chr17 | 18884905  | 18885325  | intron (NM_001039999, intron 3 of 5)  |
| <i>GIPC2</i>    | chr1  | 78511476  | 78511954  | 5' UTR (NM_017655, exon 1 of 6)       |
| <i>LPIN2</i>    | chr18 | 2984759   | 2985330   | intron (NM_014646, intron 1 of 19)    |
| <i>C1orf210</i> | chr1  | 43751397  | 43751732  | promoter-TSS (NM_001164829)           |
| <i>PRKCA</i>    | chr17 | 64455871  | 64456407  | intron (NM_002737, intron 2 of 16)    |
| <i>MFHAS1</i>   | chr8  | 8746240   | 8746503   | intron (NM_004225, intron 1 of 2)     |
| <i>ALDH18A1</i> | chr10 | 97394821  | 97395606  | intron (NM_001017423, intron 5 of 17) |
| <i>HNRNPF</i>   | chr10 | 43894713  | 43895096  | intron (NM_001098204, intron 1 of 3)  |
| <i>ACSS2</i>    | chr20 | 33462537  | 33462851  | promoter-TSS (NM_001242393)           |
| <i>TMPRSS2</i>  | chr21 | 42847994  | 42848236  | intron (NM_001135099, intron 8 of 13) |
| <i>KALRN</i>    | chr3  | 124330328 | 124330698 | intron (NM_007064, intron 1 of 26)    |
| <i>KIF5B</i>    | chr10 | 32312213  | 32312513  | intron (NM_004521, intron 15 of 25)   |
| <i>GPR160</i>   | chr3  | 169755458 | 169755960 | promoter-TSS (NM_014373)              |
| <i>AQP11</i>    | chr11 | 77304834  | 77305314  | intron (NM_173039, intron 1 of 2)     |
| <i>FBLN7</i>    | chr2  | 112927105 | 112927573 | intron (NM_153214, intron 3 of 7)     |
| <i>ANG</i>      | chr14 | 21155367  | 21156495  | intron (NM_002937, intron 1 of 1)     |
| <i>LIMA1</i>    | chr12 | 50582045  | 50582399  | intron (NM_016357, intron 9 of 10)    |

|                 |       |           |           |                                        |
|-----------------|-------|-----------|-----------|----------------------------------------|
| <i>ATP8B1</i>   | chr18 | 55465867  | 55466252  | intron (NM_005603, intron 1 of 27)     |
| <i>ERBB3</i>    | chr12 | 56473706  | 56474028  | promoter-TSS (NM_001982)               |
| <i>PKP2</i>     | chr12 | 33044930  | 33045176  | intron (NM_001005242, intron 1 of 12)  |
| <i>SLC30A10</i> | chr1  | 220100626 | 220100945 | intron (NR_046437, intron 1 of 3)      |
| <i>ATP2C2</i>   | chr16 | 84448551  | 84448885  | intron (NM_001286527, intron 6 of 27)  |
| <i>ABCC6P1</i>  | chr16 | 18588043  | 18588329  | intron (NR_003569, intron 4 of 9)      |
| <i>SLC25A13</i> | chr7  | 95950367  | 95950910  | intron (NR_027662, intron 1 of 16)     |
| <i>ZNF512B</i>  | chr20 | 62600054  | 62600781  | intron (NM_020713, intron 1 of 16)     |
| <i>PDSS1</i>    | chr10 | 26989865  | 26990149  | intron (NM_014317, intron 1 of 11)     |
| <i>THOC2</i>    | chrX  | 122866805 | 122867048 | promoter-TSS (NM_001081550)            |
| <i>NNMT</i>     | chr11 | 114080677 | 114081011 | intron (NM_001018011, intron 4 of 6)   |
| <i>SEMA4G</i>   | chr10 | 102723519 | 102724033 | 3' UTR (NM_018121, exon 20 of 20)      |
| <i>TMEM82</i>   | chr1  | 16068718  | 16069109  | promoter-TSS (NM_001013641)            |
| <i>SULT1B1</i>  | chr4  | 70620887  | 70621296  | intron (NM_014465, intron 1 of 7)      |
| <i>HTRA2</i>    | chr2  | 74756144  | 74757346  | exon (NM_181575, exon 1 of 12)         |
| <i>LGALS4</i>   | chr19 | 39309725  | 39310260  | intron (NM_001398, intron 3 of 9)      |
| <i>GOLM1</i>    | chr9  | 88708650  | 88709044  | intron (NM_177937, intron 1 of 9)      |
| <i>ARAP1</i>    | chr11 | 72477213  | 72477916  | intron (NM_006645, intron 2 of 6)      |
| <i>ARHGAP21</i> | chr10 | 25011972  | 25012338  | intron (NM_020824, intron 1 of 25)     |
| <i>SLC7A9</i>   | chr19 | 33360439  | 33360835  | promoter-TSS (NM_001126335)            |
| <i>CGN</i>      | chr1  | 151492821 | 151493199 | intron (NM_020770, intron 4 of 20)     |
| <i>PLCH1</i>    | chr3  | 155340513 | 155340723 | intron (NM_014996, intron 1 of 21)     |
| <i>TMEM144</i>  | chr4  | 159132541 | 159132849 | 5' UTR (NM_018342, exon 2 of 13)       |
| <i>UROD</i>     | chr1  | 45477621  | 45478007  | promoter-TSS (NM_000374)               |
| <i>RILPL1</i>   | chr12 | 123983062 | 123983446 | exon (NM_178314, exon 4 of 7)          |
| <i>CEBPG</i>    | chr19 | 33890820  | 33891316  | intron (NM_001166056, intron 10 of 12) |
| <i>SLC44A1</i>  | chr9  | 108053606 | 108054070 | intron (NM_080546, intron 1 of 15)     |
| <i>USP8</i>     | chr15 | 50715589  | 50716042  | promoter-TSS (NM_001128610)            |
| <i>TBC1D25</i>  | chrX  | 48407281  | 48407575  | intron (NM_002536, intron 3 of 5)      |
| <i>KBTBD12</i>  | chr3  | 127694398 | 127694780 | intron (NM_207335, intron 4 of 4)      |
| <i>FBXO44</i>   | chr1  | 11708555  | 11708882  | 3' UTR (NM_012168, exon 6 of 6)        |
| <i>NR1I2</i>    | chr3  | 119544560 | 119545113 | 3' UTR (NM_002093, exon 12 of 12)      |
| <i>ANK3</i>     | chr10 | 62182476  | 62183033  | intron (NM_001204403, intron 2 of 43)  |
| <i>DDAH1</i>    | chr1  | 85904036  | 85904445  | intron (NM_001134445, intron 2 of 6)   |
| <i>NBEAL1</i>   | chr2  | 203905953 | 203906338 | intron (NM_001114132, intron 2 of 54)  |
| <i>MAP3K13</i>  | chr3  | 185046386 | 185046929 | intron (NM_001242317, intron 2 of 12)  |
| <i>RNF103</i>   | chr2  | 86859838  | 86860176  | intron (NM_001198954, intron 2 of 7)   |
| <i>TSPAN3</i>   | chr15 | 77359650  | 77359997  | intron (NM_198902, intron 1 of 5)      |
| <i>TBC1D8B</i>  | chrX  | 106045736 | 106046047 | promoter-TSS (NM_198881)               |
| <i>STK39</i>    | chr2  | 169047057 | 169047775 | intron (NM_013233, intron 1 of 17)     |
| <i>MYO5B</i>    | chr18 | 47721021  | 47721605  | 5' UTR (NM_001080467, exon 1 of 40)    |
| <i>AGPAT9</i>   | chr4  | 84527113  | 84527370  | TTS (NM_032717)                        |
| <i>SLC35A3</i>  | chr1  | 100435051 | 100435663 | promoter-TSS (NM_001271685)            |
| <i>ST3GAL3</i>  | chr1  | 44223108  | 44223342  | intron (NM_001270463, intron 2 of 7)   |



|                 |       |           |           |                                        |
|-----------------|-------|-----------|-----------|----------------------------------------|
| <i>KLF5</i>     | chr13 | 73559756  | 73560126  | intron (NM_006346, intron 16 of 17)    |
| <i>PAK1</i>     | chr11 | 77170396  | 77170693  | intron (NM_001128620, intron 1 of 15)  |
| <i>PLEKHA6</i>  | chr1  | 204317393 | 204317652 | intron (NM_014935, intron 1 of 22)     |
| <i>GOLPH3L</i>  | chr1  | 150640261 | 150640711 | intron (NM_018178, intron 2 of 4)      |
| <i>ANKS4B</i>   | chr16 | 21271987  | 21272738  | intron (NM_001888, intron 9 of 9)      |
| <i>RBM27</i>    | chr5  | 145593083 | 145593368 | intron (NM_018989, intron 1 of 20)     |
| <i>C9orf129</i> | chr9  | 96075250  | 96075590  | intron (NM_001282394, intron 28 of 29) |
| <i>ADD3</i>     | chr10 | 111767278 | 111767625 | promoter-TSS (NM_001121)               |
| <i>SLC35D2</i>  | chr9  | 99153502  | 99154147  | intron (NM_153695, intron 4 of 4)      |
| <i>ENTPD5</i>   | chr14 | 74462633  | 74463069  | intron (NM_001249, intron 3 of 15)     |
| <i>DOPEY2</i>   | chr21 | 37574513  | 37574974  | intron (NM_005128, intron 4 of 36)     |
| <i>FGD4</i>     | chr1  | 216038405 | 216038720 | intron (NM_206933, intron 44 of 71)    |
| <i>LTBP3</i>    | chr16 | 67595892  | 67596318  | promoter-TSS (NM_006565)               |
| <i>SH3RF1</i>   | chr1  | 48688174  | 48688585  | promoter-TSS (NM_001135181)            |
| <i>LCOR</i>     | chr9  | 99252888  | 99254245  | TTS (NM_014282)                        |
| <i>CDHR5</i>    | chr4  | 74464761  | 74465316  | intron (NM_201431, intron 2 of 10)     |
| <i>HMGCS2</i>   | chr17 | 41052371  | 41052950  | promoter-TSS (NM_000151)               |
| <i>FCHO2</i>    | chr4  | 100495675 | 100496262 | 5' UTR (NM_000253, exon 2 of 19)       |
| <i>CNOT6</i>    | chr7  | 130985929 | 130986231 | intron (NM_001145354, intron 2 of 18)  |
| <i>ZDHHC9</i>   | chr6  | 47488017  | 47488268  | intron (NM_012120, intron 2 of 17)     |
| <i>DPP8</i>     | chr4  | 25156438  | 25156928  | exon (NM_016955, exon 5 of 11)         |
| <i>AVL9</i>     | chr10 | 52645211  | 52645593  | promoter-TSS (NM_014576)               |
| <i>ARL5B</i>    | chr13 | 41575786  | 41576099  | intron (NM_172373, intron 1 of 8)      |
| <i>PLD1</i>     | chr7  | 45075896  | 45076298  | intron (NM_001029835, intron 1 of 9)   |
| <i>LRRC8B</i>   | chr17 | 46029488  | 46029981  | 3' UTR (NM_024320, exon 2 of 2)        |
| <i>NAT1</i>     | chr5  | 133984084 | 133984471 | promoter-TSS (NM_001252231)            |
| <i>MECOM</i>    | chr21 | 18899515  | 18899775  | intron (NM_001207063, intron 1 of 4)   |
| <i>SNX4</i>     | chr16 | 15073740  | 15074046  | intron (NM_001285449, intron 1 of 16)  |
| <i>BARD1</i>    | chr11 | 57532013  | 57532381  | intron (NM_001085467, intron 1 of 16)  |
| <i>DENND1B</i>  | chr14 | 92364860  | 92365109  | intron (NM_006329, intron 4 of 10)     |
| <i>DRAP1</i>    | chr2  | 231904621 | 231905144 | intron (NM_001144994, intron 1 of 2)   |
| <i>IYD</i>      | chrX  | 106361798 | 106362154 | promoter-TSS (NM_001171080)            |
| <i>DNAJC22</i>  | chr1  | 15911047  | 15911877  | exon (NM_024758, exon 1 of 7)          |
| <i>PLA2G12B</i> | chr1  | 26324313  | 26325007  | promoter-TSS (NM_000437)               |
| <i>KIAA1161</i> | chr18 | 774877    | 775204    | intron (NM_005433, intron 1 of 11)     |
| <i>LYPD6</i>    | chr4  | 57107603  | 57107963  | intron (NM_020722, intron 2 of 10)     |
| <i>KCNE3</i>    | chr4  | 48018102  | 48018495  | promoter-TSS (NM_207330)               |
| <i>HKDC1</i>    | chr9  | 139971858 | 139972098 | promoter-TSS (NM_207309)               |
| <i>PRDM10</i>   | chr2  | 219283499 | 219284178 | promoter-TSS (NM_007127)               |
| <i>ACOX1</i>    | chr12 | 32686995  | 32687343  | intron (NM_139241, intron 1 of 16)     |
| <i>SMEK2</i>    | chr11 | 65318963  | 65319423  | intron (NM_021070, intron 8 of 26)     |
| <i>GK3P</i>     | chr4  | 170338869 | 170339154 | intron (NM_001199400, intron 28 of 32) |
| <i>CDC14B</i>   | chr10 | 98623639  | 98624155  | intron (NM_001170765, intron 2 of 7)   |
| <i>RNF166</i>   | chr11 | 624760    | 625214    | promoter-TSS (NM_001171968)            |

|                 |       |           |           |                                       |
|-----------------|-------|-----------|-----------|---------------------------------------|
| <i>MFSD9</i>    | chr1  | 120308924 | 120309414 | intron (NM_005518, intron 1 of 9)     |
| <i>VKORC1</i>   | chr4  | 111119679 | 111120061 | promoter-TSS (NM_001130721)           |
| <i>SLC35D1</i>  | chr2  | 88427347  | 88428313  | promoter-TSS (NM_001443)              |
| <i>ACER3</i>    | chr17 | 55162863  | 55164094  | intron (NM_001242903, intron 1 of 11) |
| <i>STRN</i>     | chr6  | 131958171 | 131958568 | promoter-TSS (NM_005021)              |
| <i>TCEA2</i>    | chr14 | 73571032  | 73571270  | intron (NM_021239, intron 10 of 18)   |
| <i>PTPRH</i>    | chr1  | 207131048 | 207131303 | TTS (NM_001122979)                    |
| <i>OAT</i>      | chr1  | 184761531 | 184761926 | 3' UTR (NM_052966, exon 14 of 14)     |
| <i>SLC26A3</i>  | chr4  | 88296824  | 88297328  | intron (NM_016245, intron 2 of 6)     |
| <i>TAOK3</i>    | chr18 | 61078047  | 61078304  | intron (NM_004869, intron 2 of 10)    |
| <i>ICK</i>      | chr2  | 26267202  | 26267552  | intron (NM_016131, intron 1 of 5)     |
| <i>MRPL35</i>   | chr2  | 191331516 | 191331812 | intron (NM_017694, intron 3 of 7)     |
| <i>PARP4</i>    | chr15 | 94903625  | 94903845  | intron (NM_001159644, intron 2 of 9)  |
| <i>AIM1</i>     | chr2  | 165794144 | 165794645 | intron (NM_173512, intron 4 of 9)     |
| <i>WAPAL</i>    | chr13 | 113365744 | 113366076 | intron (NM_015205, intron 1 of 29)    |
| <i>CLDN12</i>   | chr10 | 98397396  | 98398036  | intron (NM_152309, intron 8 of 16)    |
| <i>ENTPD7</i>   | chr19 | 5839440   | 5839987   | promoter-TSS (NM_000150)              |
| <i>TMEM181</i>  | chr7  | 197478    | 197847    | intron (NM_020223, intron 2 of 9)     |
| <i>HEATR5A</i>  | chr6  | 116382492 | 116382872 | promoter-TSS (NM_002031)              |
| <i>BCL2L14</i>  | chr15 | 52346621  | 52346928  | intron (NM_002748, intron 3 of 5)     |
| <i>MYO1A</i>    | chr9  | 74736490  | 74736779  | intron (NM_001242507, intron 1 of 13) |
| <i>SLC13A2</i>  | chr16 | 18812602  | 18813380  | promoter-TSS (NM_015161)              |
| <i>CPD</i>      | chr12 | 100673653 | 100673908 | intron (NM_017988, intron 1 of 17)    |
| <i>MPP5</i>     | chr12 | 100949499 | 100950021 | intron (NM_001206992, intron 7 of 8)  |
| <i>CES2</i>     | chr6  | 54794293  | 54794791  | intron (NM_001010872, intron 4 of 4)  |
| <i>SMAGP</i>    | chr1  | 67635679  | 67635932  | intron (NM_144701, intron 3 of 10)    |
| <i>LONP2</i>    | chr5  | 142186974 | 142187539 | intron (NM_015071, intron 1 of 22)    |
| <i>PRKAA1</i>   | chr4  | 170589521 | 170589842 | intron (NM_001243374, intron 1 of 11) |
| <i>EIF3A</i>    | chr10 | 101939349 | 101939834 | intron (NM_001100626, intron 3 of 11) |
| <i>TNFSF15</i>  | chr7  | 141804658 | 141804946 | intron (NM_004668, intron 47 of 47)   |
| <i>AKR1B10</i>  | chr2  | 38904875  | 38905246  | intron (NM_138801, intron 2 of 6)     |
| <i>CYP4F2</i>   | chr9  | 80619441  | 80619753  | intron (NM_002072, intron 1 of 6)     |
| <i>TNPO3</i>    | chr2  | 234620078 | 234620400 | intron (NM_001072, intron 1 of 4)     |
| <i>STXBP3</i>   | chr2  | 112842644 | 112843114 | intron (NM_032824, intron 8 of 18)    |
| <i>ADH4</i>     | chr2  | 85581214  | 85581943  | promoter-TSS (NM_001135022)           |
| <i>SYTL5</i>    | chr10 | 99275363  | 99275663  | intron (NM_024954, intron 1 of 2)     |
| <i>CMPK1</i>    | chr7  | 99317899  | 99318279  | intron (NM_000765, intron 3 of 12)    |
| <i>C11orf54</i> | chr6  | 82957435  | 82957807  | promoter-TSS (NM_015525)              |
| <i>BAZ2B</i>    | chr9  | 115984775 | 115985126 | intron (NM_001859, intron 1 of 4)     |
| <i>LONRF3</i>   | chr11 | 60552612  | 60552823  | promoter-TSS (NM_206893)              |
| <i>ELOVL6</i>   | chr5  | 175972706 | 175973075 | intron (NM_001171976, intron 1 of 31) |
| <i>FABP1</i>    | chr3  | 124710847 | 124711217 | intron (NM_020733, intron 12 of 16)   |
| <i>AKAP1</i>    | chr4  | 69961928  | 69962364  | promoter-TSS (NM_001074)              |
| <i>ENPP3</i>    | chr2  | 44065558  | 44066502  | promoter-TSS (NM_022436)              |

|                 |       |           |           |                                        |
|-----------------|-------|-----------|-----------|----------------------------------------|
| <i>PSEN1</i>    | chr6  | 33377611  | 33378284  | promoter-TSS (NM_002636).2             |
| <i>PIGR</i>     | chrX  | 95976425  | 95976679  | intron (NM_007309, intron 1 of 26)     |
| <i>EDEM3</i>    | chr3  | 111395610 | 111395922 | intron (NM_153268, intron 1 of 3)      |
| <i>HSD17B11</i> | chr11 | 2368702   | 2368969   | intron (NR_108080, intron 1 of 2)      |
| <i>VPS4B</i>    | chr10 | 72164992  | 72165525  | intron (NM_004096, intron 1 of 2)      |
| <i>RAB10</i>    | chr18 | 72208896  | 72209670  | intron (NM_032649, intron 1 of 11)     |
| <i>MFSD6</i>    | chr6  | 46760821  | 46761191  | promoter-TSS (NM_005588)               |
| <i>MCTP2</i>    | chr16 | 75561730  | 75562102  | TTS (NM_024533)                        |
| <i>SLC38A11</i> | chr5  | 72251563  | 72252030  | promoter-TSS (NM_138782)               |
| <i>ATP11A</i>   | chr5  | 179921067 | 179921480 | promoter-TSS (NM_015455)               |
| <i>TM9SF3</i>   | chrX  | 128960103 | 128960424 | intron (NM_001008222, intron 3 of 9)   |
| <i>FUT6</i>     | chr15 | 65809862  | 65810186  | promoter-TSS (NM_197960)               |
| <i>FAM20C</i>   | chr7  | 32555623  | 32555936  | intron (NM_015060, intron 1 of 15)     |
| <i>FRK</i>      | chr10 | 18948963  | 18949457  | intron (NM_178815, intron 1 of 5)      |
| <i>MAPK6</i>    | chr3  | 171524296 | 171524564 | intron (NM_001130081, intron 1 of 25)  |
| <i>GDA</i>      | chr1  | 90053355  | 90053776  | intron (NM_001134476, intron 7 of 7)   |
| <i>ARL6IP1</i>  | chr8  | 18027739  | 18027994  | promoter-TSS (NM_001160179)            |
| <i>SCYL2</i>    | chr3  | 169286135 | 169286462 | intron (NM_004991, intron 1 of 16)     |
| <i>GAS2L3</i>   | chr3  | 125201212 | 125201660 | intron (NR_073435, intron 5 of 12)     |
| <i>FAM83B</i>   | chr2  | 215674399 | 215674750 | promoter-TSS (NM_001282549)            |
| <i>IL23R</i>    | chr1  | 197589639 | 197590088 | intron (NM_001195215, intron 10 of 22) |
| <i>ARHGAP26</i> | chr11 | 65686684  | 65687014  | promoter-TSS (NM_001135635)            |
| <i>CLCN3</i>    | chr6  | 150689839 | 150690209 | promoter-TSS (NM_001164695)            |
| <i>ERLIN1</i>   | chr12 | 49741474  | 49741988  | intron (NM_024902, intron 1 of 2)      |
| <i>LOC93432</i> | chr10 | 74714361  | 74714838  | promoter-TSS (NM_032562)               |
| <i>GALM</i>     | chr9  | 34374871  | 34375476  | intron (NM_020702, intron 1 of 1)      |
| <i>GNAQ</i>     | chr2  | 150276553 | 150276979 | intron (NM_194317, intron 1 of 4)      |
| <i>UGT1A5</i>   | chr11 | 74176435  | 74176740  | intron (NM_005472, intron 1 of 2)      |
| <i>TMEM87B</i>  | chr10 | 70982075  | 70982477  | intron (NM_025130, intron 1 of 17)     |
| <i>RETSAT</i>   | chr11 | 129843664 | 129844068 | intron (NM_020228, intron 1 of 21)     |
| <i>UBTD1</i>    | chr17 | 73974949  | 73975940  | promoter-TSS (NM_004035)               |
| <i>CYP3A7</i>   | chr2  | 55844573  | 55845269  | promoter-TSS (NM_020463)               |
| <i>IBTK</i>     | chr4  | 166177631 | 166177806 | intron (NM_001161521, intron 4 of 14)  |
| <i>SLC31A1</i>  | chr9  | 99328576  | 99329348  | intron (NM_003671, intron 1 of 12)     |
| <i>MS4A10</i>   | chr16 | 88766804  | 88767093  | intron (NM_001171816, intron 2 of 5)   |
| <i>CDHR2</i>    | chr2  | 103340455 | 103340919 | intron (NM_032718, intron 4 of 5)      |
| <i>MUC13</i>    | chr16 | 31104640  | 31105006  | intron (NM_024006, intron 1 of 2)      |
| <i>UGT2B7</i>   | chr1  | 67519172  | 67520200  | exon (NM_015139, exon 1 of 12)         |
| <i>ABCG5</i>    | chr11 | 76600473  | 76600788  | intron (NM_018367, intron 1 of 10)     |
| <i>PHF1</i>     | chr2  | 37142739  | 37142999  | intron (NM_003162, intron 3 of 17)     |
| <i>DIAPH2</i>   | chr20 | 62689097  | 62689385  | intron (NM_198723, intron 1 of 10)     |
| <i>PLCXD2</i>   | chr19 | 55717923  | 55718291  | exon (NM_001161440, exon 3 of 18)      |
| <i>CD81</i>     | chr10 | 126107254 | 126107723 | promoter-TSS (NM_000274)               |
| <i>EIF4EBP2</i> | chr7  | 107420034 | 107420602 | intron (NM_000111, intron 11 of 20)    |

|                 |       |           |           |                                       |
|-----------------|-------|-----------|-----------|---------------------------------------|
| <i>CNDP1</i>    | chr12 | 118810752 | 118811281 | promoter-TSS (NM_016281)              |
| <i>MEP1A</i>    | chr6  | 52926344  | 52926981  | promoter-TSS (NM_014920)              |
| <i>CHST5</i>    | chr2  | 86462409  | 86462841  | intron (NM_001164732, intron 3 of 4)  |
| <i>KCTD3</i>    | chr13 | 25086156  | 25087110  | intron (NM_006437, intron 1 of 33)    |
| <i>CTCF</i>     | chr6  | 106960147 | 106960701 | exon (NM_001624, exon 1 of 20)        |
| <i>SLC5A9</i>   | chr10 | 88210612  | 88210922  | intron (NM_015045, intron 15 of 18)   |
| <i>HABP4</i>    | chr7  | 90039016  | 90039277  | intron (NM_001185073, intron 2 of 2)  |
| <i>RASSF6</i>   | chr10 | 101433119 | 101433546 | intron (NM_020354, intron 3 of 12)    |
| <i>G6PC</i>     | chr6  | 158957032 | 158957450 | promoter-TSS (NM_020823)              |
| <i>MTTP</i>     | chr14 | 31888941  | 31890506  | promoter-TSS (NM_015473)              |
| <i>MKLN1</i>    | chr12 | 12235082  | 12235403  | intron (NM_030766, intron 2 of 5)     |
| <i>CD2AP</i>    | chr12 | 57443715  | 57444101  | promoter-TSS (NM_005379)              |
| <i>SEPSECS</i>  | chr17 | 26802211  | 26802615  | intron (NM_001145975, intron 1 of 11) |
| <i>A1CF</i>     | chr17 | 28732057  | 28732439  | intron (NM_001199775, intron 2 of 20) |
| <i>ELF1</i>     | chr14 | 67708133  | 67708605  | intron (NM_022474, intron 1 of 14)    |
| <i>CCM2</i>     | chr16 | 66969178  | 66969623  | exon (NM_003869, exon 1 of 12)        |
| <i>PRR15L</i>   | chr12 | 51664441  | 51664815  | promoter-TSS (NM_001033873)           |
| <i>SEC24A</i>   | chr16 | 48277979  | 48278386  | promoter-TSS (NM_031490)              |
| <i>CXADR</i>    | chr5  | 40784303  | 40784706  | intron (NM_206907, intron 1 of 9)     |
| <i>PDXDC1</i>   | chr10 | 120840200 | 120840697 | promoter-TSS (NM_003750)              |
| <i>CTNND1</i>   | chr9  | 117566789 | 117567103 | intron (NM_005118, intron 1 of 3)     |
| <i>TC2N</i>     | chr7  | 134212029 | 134212326 | promoter-TSS (NM_020299)              |
| <i>C2orf72</i>  | chr19 | 16008631  | 16009142  | promoter-TSS (NM_001082)              |
| <i>RBM41</i>    | chr7  | 128694770 | 128695388 | promoter-TSS (NR_002187)              |
| <i>AGMAT</i>    | chr1  | 109288926 | 109289269 | promoter-TSS (NM_007269)              |
| <i>PAFAH2</i>   | chr4  | 100065361 | 100065690 | promoter-TSS (NM_000670)              |
| <i>YES1</i>     | chrX  | 37878361  | 37878639  | intron (NM_138780, intron 1 of 16)    |
| <i>KIAA1211</i> | chr1  | 47800162  | 47800599  | intron (NM_001136140, intron 1 of 4)  |
| <i>NIPAL1</i>   | chr11 | 93474976  | 93475380  | promoter-TSS (NM_024116)              |
| <i>UAP1L1</i>   | chr2  | 160471836 | 160472328 | intron (NM_013450, intron 1 of 36)    |
| <i>VIL1</i>     | chrX  | 118110082 | 118110348 | promoter-TSS (NM_001289109)           |

Chr, chromosome; TSS, transcriptional start site.

**Table S6.** HNF4G target genes enriched in the cell-cell junction pathway

| Gene          | Pearson r | P value  |
|---------------|-----------|----------|
| <i>CDH1</i>   | 0.45      | 2.07E-10 |
| <i>CDHR2</i>  | 0.53      | 3.30E-14 |
| <i>CDHR5</i>  | 0.59      | 1.83E-18 |
| <i>CTNND1</i> | 0.49      | 5.35E-12 |
| <i>GRHL2</i>  | 0.45      | 3.11E-10 |
| <i>MPP5</i>   | 0.44      | 5.59E-10 |
| <i>OCLN</i>   | 0.56      | 5.77E-16 |
| <i>STRN</i>   | 0.50      | 1.52E-12 |
| <i>LIMA1</i>  | 0.54      | 7.77E-15 |
| <i>RAB10</i>  | 0.43      | 1.99E-09 |
| <i>CGN</i>    | 0.43      | 5.94E-09 |
| <i>KIF5B</i>  | 0.50      | 9.47E-13 |
| <i>MYO6</i>   | 0.53      | 3.91E-14 |
| <i>PDXDC1</i> | 0.64      | 8.52E-22 |
| <i>SPTBN1</i> | 0.45      | 2.87E-10 |
| <i>TJP2</i>   | 0.44      | 6.85E-10 |
| <i>TMEM2</i>  | -0.35     | 1.57E-06 |
| <i>USP8</i>   | 0.43      | 2.50E-09 |
| <i>CCM2</i>   | -0.43     | 1.49E-09 |
| <i>CXADR</i>  | 0.58      | 2.09E-17 |
| <i>ANK3</i>   | 0.43      | 2.71E-09 |
| <i>CLDN12</i> | 0.49      | 3.86E-12 |
| <i>FZD5</i>   | 0.52      | 1.11E-13 |
| <i>MAGI3</i>  | 0.49      | 5.15E-12 |
| <i>CD2AP</i>  | 0.49      | 4.69E-12 |
| <i>PKP2</i>   | 0.40      | 2.28E-08 |
| <i>SMAGP</i>  | 0.44      | 1.02E-09 |
| <i>ADD3</i>   | 0.53      | 1.93E-14 |
| <i>PAK1</i>   | 0.49      | 4.61E-12 |
| <i>PTPRK</i>  | 0.43      | 2.25E-09 |
| <i>YES1</i>   | 0.44      | 4.93E-10 |
| <i>PRKCA</i>  | 0.56      | 1.53E-08 |

**Table S7.** Scansite predicted HNF4G phosphorylation motifs and the corresponding kinases

| Kinase        | HNF4G motif                   | Score | Site | Site sequence   |
|---------------|-------------------------------|-------|------|-----------------|
| <i>PDPK1</i>  | PK1 Binding                   | 0.94  | D97  | STRRSTFdGSNIPSI |
| <i>CLK2</i>   | Clk2 Kinase                   | 0.84  | S43  | FRRSIRKsHVYSCRf |
| <i>IPCEF1</i> | PIP3-binding PH               | 0.83  | F35  | SCDGCKGfFRRSIRK |
| <i>PRKAA1</i> | AMP Kinase                    | 0.71  | T106 | SNIPSINTLAQAEVR |
| <i>AURKA</i>  | Aurora A                      | 0.69  | S188 | LLGATKRsMMYKDIL |
| <i>PIK3R1</i> | p85 SH3 mode1                 | 0.68  | P376 | STPETPLpSPPQGSG |
| <i>AKT1</i>   | Akt Kinase                    | 0.66  | T91  | NERDRISrRRSTFDG |
| <i>HCLS1</i>  | Cortactin SH3                 | 0.65  | P376 | STPETPLpSPPQGSG |
| <i>MAPK3</i>  | Erk1 Kinase                   | 0.65  | T350 | HLSQDPLtGQTILLG |
| <i>CDK5</i>   | Cdk5 Kinase                   | 0.64  | S121 | SRQISVSsPGSSTDI |
| <i>GSK3A</i>  | GSK3 Kinase                   | 0.62  | S114 | LAQAEVRsRQISVSS |
| <i>GSK3B</i>  | GSK3-improved Acidophilic     | 0.60  | S114 | LAQAEVRsRQISVSS |
| <i>MAPK1</i>  | Erk D-domain                  | 0.58  | L288 | SRGRFGEILLLLPTL |
| <i>PRKACG</i> | Protein Kinase A              | 0.56  | S39  | CKGFFRRsIRKSHVY |
| <i>CAMK2G</i> | Calmodulin dependent kinase 2 | 0.55  | T95  | RISTRrStFDGSNIP |
| <i>AURKB</i>  | Aurora B                      | 0.55  | S39  | CKGFFRRsIRKSHVY |
| <i>ABL1</i>   | Abl SH3                       | 0.54  | P376 | STPETPLpSPPQGSG |
| <i>YWHAZ</i>  | 41701 Mode 1                  | 0.53  | S118 | EVRSRQIsVSSPGSS |
| <i>PRKCZ</i>  | PKC zeta                      | 0.52  | S39  | CKGFFRRsIRKSHVY |
| <i>PRKDC</i>  | DNA PK                        | 0.52  | S345 | HPMHPHLSQDPLTGQ |
| <i>GRB2</i>   | Grb2 SH2                      | 0.51  | Y273 | VQIGLEdyINDRQYD |
| <i>PRKCE</i>  | PKC epsilon                   | 0.51  | S39  | CKGFFRRsIRKSHVY |
| <i>ITK</i>    | Itk Kinase                    | 0.50  | Y201 | ILLLGNNyVIHRNSC |
| <i>PRKCD</i>  | PKC delta                     | 0.50  | S43  | FRRSIRKsHVYSCRf |
| <i>NCK1</i>   | Nck 2nd SH3                   | 0.48  | P376 | STPETPLpSPPQGSG |
| <i>CDK1</i>   | CDK1 motif 1 - [ST]Px[KR]x    | 0.43  | S121 | SRQISVSsPGSSTDI |
| <i>SRC</i>    | Src SH3                       | 0.41  | P376 | STPETPLpSPPQGSG |
| <i>PRKCA</i>  | PKC alpha/beta/gamma          | 0.36  | S39  | CKGFFRRsIRKSHVY |
| <i>ATM</i>    | ATM Kinase                    | 0.30  | S345 | HPMHPHLSQDPLTGQ |

**Table S8.** Baseline characteristics and clinical data of patients with PDAC in this study

|                 | No. of patients | SMAD4– (N = 103)* |            | SMAD4+ (N = 36)* |            |
|-----------------|-----------------|-------------------|------------|------------------|------------|
|                 |                 | Metformin (%)     | Others (%) | Metformin (%)    | Others (%) |
| Sex             |                 |                   |            |                  |            |
| Male            | 92              | 24 (26.1)         | 44 (47.8)  | 9 (9.8)          | 15 (16.3)  |
| Female          | 47              | 9 (19.2)          | 26 (55.3)  | 4 (8.5)          | 8 (17.0)   |
| Age (years)     |                 |                   |            |                  |            |
| ≤ 60            | 49              | 13 (26.5)         | 21 (42.9)  | 5 (10.2)         | 10 (20.4)  |
| > 60            | 90              | 20 (22.2)         | 49 (54.5)  | 8 (8.9)          | 13 (14.4)  |
| Type 2 Diabetes |                 |                   |            |                  |            |
| Recent-onset    | 52              | 16 (30.8)         | 23 (44.2)  | 6 (11.5)         | 7 (13.5)   |
| Long-standing   | 79              | 17 (21.5)         | 39 (49.4)  | 7 (8.9)          | 16 (20.2)  |
| Unknown         | 8               | 0 (0.0)           | 8 (100.0)  | 0 (0.0)          | 0 (0.0)    |
| Differentiation |                 |                   |            |                  |            |
| Well            | 21              | 6 (28.6)          | 7 (33.3)   | 3 (14.3)         | 5 (23.8)   |
| Moderate        | 80              | 17 (21.2)         | 44 (55.0)  | 7 (8.8)          | 12 (15.0)  |
| Poor            | 23              | 8 (34.8)          | 11 (47.8)  | 1 (4.4)          | 3 (13.0)   |
| Unknown         | 15              | 2 (13.3)          | 8 (53.4)   | 2 (13.3)         | 3 (20.0)   |
| Stage           |                 |                   |            |                  |            |
| I               | 26              | 9 (34.6)          | 11 (42.3)  | 1 (3.9)          | 5 (19.2)   |
| II              | 65              | 15 (23.1)         | 32 (49.2)  | 8 (12.3)         | 10 (15.4)  |
| III             | 13              | 1 (7.7)           | 8 (61.5)   | 2 (15.4)         | 2 (15.4)   |
| IV              | 18              | 6 (33.3)          | 9 (50.0)   | 2 (11.1)         | 1 (5.6)    |
| Unknown         | 17              | 2 (11.8)          | 10 (58.8)  | 0 (0.0)          | 5 (29.4)   |
| Survival status |                 |                   |            |                  |            |
| Death           | 56              | 10 (17.9)         | 30 (53.5)  | 6 (10.7)         | 10 (17.9)  |
| Survival        | 82              | 22 (26.8)         | 40 (48.8)  | 7 (8.5)          | 13 (15.9)  |
| Unknown         | 1               | 1 (100.0)         | 0 (0.0)    | 0 (0.0)          | 0 (0.0)    |

\*SMAD4–, immunohistochemistry (IHC) score = 0; SMAD4+, IHC score > 0.

**Table S9.** Sequences of primers, siRNAs and sgRNAs used in this study

| Primer           | Used for      | Sequence (5'-3')                   |
|------------------|---------------|------------------------------------|
| HNF4G-promoter-F | PCR           | CCGCTCGAGGTAAACAACACACCTATGAAAGATT |
| HNF4G-promoter-R | PCR           | CCCAAGCTTATGAGAGATGGATGGAAGCTGAGAC |
| HNF4G-F          | Real-time PCR | GAGGTTTGGAGAGTTGCTTCTGC            |
| HNF4G-R          | Real-time PCR | GATGACTGCCATCATTGGAAGCC            |
| GAPDH-F          | Real-time PCR | GTCTCCTCTGACTTCAACAGCG             |
| GAPDH-R          | Real-time PCR | ACCACCCTGTTGCTGTAGCCAA             |
| CDHR2-F          | Real-time PCR | GGCTCCTACAACATCTTCGTCC             |
| CDHR2-R          | Real-time PCR | GGTTGAAGAGCAGACGGCTGTT             |
| CDHR5-F          | Real-time PCR | CCTTGTCCACAAGCACTATGGC             |
| CDHR5-R          | Real-time PCR | GAGGAACGCCTGGTTGTCAAAG             |
| CTNND1-F         | Real-time PCR | GAATCGGTGCTACCAACACAG              |
| CTNND1-R         | Real-time PCR | ATCCTTCTGCCCAATCTCAGCC             |
| GRHL2-F          | Real-time PCR | CGCCTATCTCAAAGACGACCAG             |
| GRHL2-R          | Real-time PCR | CCAGGGTGTACTGAAATGTGCC             |
| MPP5-F           | Real-time PCR | TCCTCTTATCTCCAACGCACAAG            |
| MPP5-R           | Real-time PCR | CTGCTCAGCAACCTTATCGTGG             |
| OCLN-F           | Real-time PCR | ATGGCAAAGTGAATGACAAGCGG            |
| OCLN-R           | Real-time PCR | CTGTAACGAGGCTGCCTGAAGT             |
| STRN-F           | Real-time PCR | GTCCTGTTCAGCAGATGGCACT             |
| STRN-R           | Real-time PCR | CTGCTCACTAGATCCACAGAGG             |
| LIMA1-F          | Real-time PCR | AATAGCCTGGCAGTCCGTTCCA             |
| LIMA1-R          | Real-time PCR | GGAATCTGGACTTAGTGGCTTGG            |
| RAB10-F          | Real-time PCR | AAGGCGTTCCTCACGTTAGCTG             |
| RAB10-R          | Real-time PCR | GGAACAGGAGAATGCTCAGCAG             |
| CGN-F            | Real-time PCR | CAAGGAGGATCTTAGAGCCACC             |
| CGN-R            | Real-time PCR | TGGCGAGTATCTCCAGCACTAG             |
| KIF5B-F          | Real-time PCR | GAGTTAGCAGCATGTCAGCTTCG            |
| KIF5B-R          | Real-time PCR | GCATCGACAGATTCTCCAAGTG             |
| MYO6-F           | Real-time PCR | CCTGACCACTTAGCAGAGTTGG             |
| MYO6-R           | Real-time PCR | TTTAATGCAGGCTTCAGCTCGATA           |
| PDXDC1-F         | Real-time PCR | GTTGAGCCCTTTGATGACCGCA             |
| PDXDC1-R         | Real-time PCR | CTTCCTGCTTGAAGTCTTACGC             |
| SPTBN1-F         | Real-time PCR | GTCACATGCCTACCAGCAGTTC             |
| SPTBN1-R         | Real-time PCR | CTCCTTCCAAGGTGGTAGGCAT             |
| TJP2-F           | Real-time PCR | ATTAGTGCGGGAGGATGCCGTT             |
| TJP2-R           | Real-time PCR | TCTGCCACAAGCCAGGATGTCT             |
| TMEM2-F          | Real-time PCR | GGAATAGGACTGACCTTTGCCAG            |
| TMEM2-R          | Real-time PCR | TTCTGACCACCCTGAAAGCCGT             |
| USP8-F           | Real-time PCR | GATCGTACCAGGACTGCCTTCA             |
| USP8-R           | Real-time PCR | GCAGATGAAGGAGCCATTTCCG             |
| CCM2-F           | Real-time PCR | GCCTCTATCCACGAGTTCTGCA             |
| CCM2-R           | Real-time PCR | AAGTGCTGGCTGTCCTTCTCAG             |
| CXADR-F          | Real-time PCR | GCTTGCTCTAGCGCTCATTGGT             |
| CXADR-R          | Real-time PCR | GCTCTTTGGAGGTGGCACATCT             |
| ANK3-F           | Real-time PCR | AAAGGACTGCCTCAAACAGCGG             |
| ANK3-R           | Real-time PCR | CTAAGGATGCGAAGCTCTGTCTG            |



|             |                           |                                       |
|-------------|---------------------------|---------------------------------------|
| CLDN12-F    | Real-time PCR             | GAGCAGTGA CTGCCTGATGTAC               |
| CLDN12-R    | Real-time PCR             | GCACATTCCAATCAGGCAGAGC                |
| FZD5-F      | Real-time PCR             | TGGAACGCTTCCGCTATCCTGA                |
| FZD5-R      | Real-time PCR             | GGTCTCGTAGTGGATGTGGTTG                |
| MAGI3-F     | Real-time PCR             | GCAGTTTCCAGTAGGTGCTGATG               |
| MAGI3-R     | Real-time PCR             | GTGGAAAAGGCATAGGCTGAGG                |
| CD2AP-F     | Real-time PCR             | CCAAAGCCTGAACTGATAGCTGC               |
| CD2AP-R     | Real-time PCR             | GGACTTGTGGAGCTGCTGTTTT                |
| PKP2-F      | Real-time PCR             | CAGGTGCTGAAGCAAACAGAG                 |
| PKP2-R      | Real-time PCR             | CCAAAGTGCTGGGATTACAGGC                |
| SMAGP-F     | Real-time PCR             | AAGATGGAGCCAGCACAGCACT                |
| SMAGP-R     | Real-time PCR             | CATAGGTGACGTAGCTGCCTTTG               |
| ADD3-F      | Real-time PCR             | GGGTCACTTGAAGAACAGGAGG                |
| ADD3-R      | Real-time PCR             | TCTCCAAGTGCAACCACACCATG               |
| PAK1-F      | Real-time PCR             | GTGAAGGCTGTGTCTGAGACTC                |
| PAK1-R      | Real-time PCR             | GGAAGTGGTTCAATCACAGACCG               |
| PTPRK-F     | Real-time PCR             | CACAGCCATCAATGTCACCACC                |
| PTPRK-R     | Real-time PCR             | CACCTTTGGCTTGTGCTGGTCT                |
| YES1-F      | Real-time PCR             | CTCCTGAAGCTGCACTGTATGG                |
| YES1-R      | Real-time PCR             | CCTGTATCCTCGCTCCACTTGT                |
| PRKCA-F     | Real-time PCR             | GCCTATGGCGTCTGTGTTGATG                |
| PRKCA-R     | Real-time PCR             | GAAACAGCCTCCTTGGACAAGG                |
| ΔSBE1-F     | Site-directed mutagenesis | GGCTGCAGGTCGACTCTAGAGGATCCCGCCACCAT   |
| ΔSBE1-R     | Site-directed mutagenesis | GGACATGGCAAATTACAGTGAAGTT             |
| T143R-F     | Site-directed mutagenesis | CCATTTACCGTAAGTTATGTGCTAGCTCATTTGTCCG |
| T143R-R     | Site-directed mutagenesis | TCATCATCCTTATAGTCCTTATCA              |
| S161A-F     | Site-directed mutagenesis | CAACATCCCCTCCATTAAACAGACTGGCACAAGCTG  |
| S161A-R     | Site-directed mutagenesis | AAGTTTCGGTCTCGCCAGATCTCAGTCTCAA       |
| S382A-F     | Site-directed mutagenesis | GAACTTCAGCTTGTGCCAGTCTGTTAATGGAGGGG   |
| S382A-R     | Site-directed mutagenesis | ATGTTGCTGCCATCAAATGTGCTTCTTCTG        |
| S161A-F     | Site-directed mutagenesis | TCTCAGTCTCAAGCCCTGGGGCAAGCACTGACATA   |
| S161A-R     | Site-directed mutagenesis | AACGTTAAGAAAATTGCAAGTATTG             |
| S382A-F     | Site-directed mutagenesis | AACGTTTATGTCAGTGCTTGCCCCAGGGCTTGAGA   |
| S382A-R     | Site-directed mutagenesis | CTGAGATCTGGCGAGACCGAATTC              |
| SBE1-ChIP-F | ChIP-qPCR                 | ATCCAATGCATCCACATTTGGCTCAAGACCCATTAA  |
| SBE1-ChIP-R | ChIP-qPCR                 | CTGGACAACTATACTTTTAGGTC               |
| siHNF4G#1   | Knockdown                 | TCCAGTTAATGGGTCTTGAGCCAAATGTGGATGCA   |
| siHNF4G#2   | Knockdown                 | TTGGATGATGGAGATGACTGCCATC             |
| siSMAD4#1   | Knockdown                 | AGCTTCTGTGAATGAGGATGAAGAA             |
| siSMAD4#2   | Knockdown                 | GTTGTTTACAGATCACCTGTGGACA             |
| siPRKAA1#1  | Knockdown                 | 5'-GCAGCAUUCGUAAGAGUCATT-3'           |
| siPRKAA1#2  | Knockdown                 | 5'-GAACGUGACAGAAUAAGCATT-3'           |
| sgHNF4G#1   | Knockout                  | 5'-GGUGGAGAGAGUGAAACAUTT-3'           |
| sgHNF4G#2   | Knockout                  | 5'-CCAGCAUCCACCAAGUAAUTT-3'           |
|             |                           | 5'-GAGGAGAGCUAUUUGAUUATT-3'           |
|             |                           | 5'-GCGUGUACGAAGGAAGAAUTT-3'           |
|             |                           | 5'-GCACTGTTGAGAGCTCACGC-3'            |
|             |                           | 5'-TCGGCAATGTGTTGTTGACA-3'            |
